# Supplementary material for: Benchmark calculations for bond dissociation energies and enthalpy of formation of chlorinated and brominated polycyclic aromatic hydrocarbons
Source: Royal Society of Chemistry journal article supplement (doi:10.1039/d1ra05391d), 2021-01-01
Supplement: d1ra05391d1.pdf [file d1ra05391d1.pdf]

## Supporting Information

### Benchmark Calculations for Bond Dissociation Energies and Enthalpy of Formations of Chlorinated and Brominated Polycyclic Aromatic Hydrocarbons

Shenyang Xu<sup>1</sup>, Quan-De Wang<sup>1,2,\*</sup>, Mao-Mao Sun<sup>2</sup>, Guoliang Yin<sup>1</sup>, Jinhu Liang<sup>1,3,\*</sup>

<sup>1</sup> Faculty of Materials and Chemical Engineering, Yibin University, Yibin, Sichuan 644000, People's Republic of China

<sup>2</sup> Low Carbon Energy Institute and School of Chemical Engineering, China University of Mining and Technology, Xuzhou 221008, People's Republic of China

<sup>3</sup> School of Environment and Safety Engineering, North University of China, Taiyuan 030051, People's Republic of China

\*Corresponding Authors, E-mail: quandewang@cumt.edu.cn (Q.-D. Wang); jhliang@nuc.edu.cn (J. Liang)

**Table S1.** Predicted BDEs of C-Cl and C-Br bond using various theoretical methods. (kcal mol<sup>-1</sup>)

| No.    | G4     | CBS-QB3 | G3    | G3MP2  | M06-2X/6-311++G(d,p) | ωB97X-D/6-311++G(d,p) | B2PLYP-D3/6-311++G(d,p) |
|--------|--------|---------|-------|--------|----------------------|-----------------------|-------------------------|
| 1 (Cl) | 96.65  | 101.25  | 98.7  | 100.07 | 94.62                | 94.04                 | 92.96                   |
| 2 (Cl) | 97.12  | 101.25  | 99.46 | 100.88 | 95.46                | 94.37                 | 93.48                   |
| 3 (Cl) | 95.81  | 100.67  | 98.99 | 100.36 | 94.67                | 94.12                 | 93.09                   |
| 4 (Cl) | 96.15  | 101.63  | 99.29 | 100.7  | 94.96                | 94.44                 | 93.35                   |
| 5 (Cl) | 94.95  | 99.3    | 97.81 | 97.94  | 94.82                | 93.99                 | 93.59                   |
| 6 (Cl) | 94.67  | 99.02   | 97.6  | 97.7   | 94.95                | 94.38                 | 93.7                    |
| 7 (Cl) | 102.55 | 99.64   | 99.07 | 99.6   | 95.08                | 94.18                 | 95.46                   |
| 8 (Cl) | 102.25 | 99.28   | 98.9  | 99.57  | 94.86                | 94.33                 | 95.22                   |
| 9 (Cl) | 102.49 | 100.21  | 97.66 | 97.73  | 94.9                 | 93.74                 | 95.93                   |

|         |        |        |        |        |       |       |       |
|---------|--------|--------|--------|--------|-------|-------|-------|
| 10 (Cl) | 99.98  | 99.45  | 103.86 | 107.28 | 94.47 | 93.67 | 93.43 |
| 11 (Cl) | 99.95  | 99.85  | 99.7   | 100.44 | 94.73 | 93.82 | 93.46 |
| 12 (Cl) | 100.26 | 100.15 | 100.2  | 100.93 | 95.13 | 94.66 | 93.94 |
| 13 (Cl) | 100.11 | 100    | 99.9   | 100.63 | 94.97 | 94.49 | 93.9  |
| 14 (Cl) | 92.31  | 92.46  | 91.64  | 92.31  | 86.25 | 85.63 | 86.07 |
| 15 (Cl) | 92.43  | 104.97 | 104.1  | 106.73 | 96.05 | 95.39 | 94.45 |
| 16 (Cl) | 91.44  | 104.11 | 102.85 | 105.52 | 95.01 | 94.47 | 93.59 |
| 17 (Cl) | 91.47  | 103.97 | 103    | 105.65 | 94.88 | 94.44 | 93.45 |
| 18 (Cl) | 91.47  | 103.98 | 102.76 | 105.4  | 94.66 | 93.99 | 93.45 |
| 19 (Cl) | 63.81  | 68.43  | 67.48  | 69.72  | 64.95 | 62.97 | 63.2  |
| 20 (Cl) | 96.29  | 103.27 | 102.91 | 103.61 | 98.94 | 98.75 | 98.32 |
| 21 (Cl) | 92.94  | 102.15 | 101.99 | 104.23 | 95.57 | 94.91 | 94.42 |
| 22 (Cl) | 91.8   | 98.38  | 97.74  | 97.77  | 94.27 | 93.74 | 93.07 |
| 23 (Cl) | 93.02  | 102.51 | 102.09 | 104.31 | 95.6  | 94.83 | 94.47 |
| 24 (Cl) | 69.17  | 71.29  | 70.83  | 73.19  | 68.92 | 66.23 | 68.16 |
| 25 (Cl) | 94.13  | 100.51 | 99.08  | 99.17  | 96.54 | 95.95 | 95.23 |
| 26 (Cl) | 92.32  | 102.82 | 97.36  | 97.45  | 94.52 | 93.94 | 93.27 |
| 27 (Cl) | 93.81  | 104.28 | 98.75  | 98.88  | 95.95 | 95.19 | 94.73 |
| 1 (Br)  | 82.6   | 89.51  | 85.08  | 85.95  | 80.04 | 81.15 | 81.44 |
| 2 (Br)  | 83.13  | 89.63  | 85.91  | 86.77  | 80.88 | 81.45 | 81.95 |
| 3 (Br)  | 81.65  | 89.12  | 85.45  | 86.3   | 80.12 | 81.23 | 81.56 |
| 4 (Br)  | 86.86  | 89.98  | 85.76  | 86.66  | 80.45 | 81.62 | 81.9  |
| 5 (Br)  | 80.96  | 87.4   | 84.32  | 83.86  | 80.03 | 80.87 | 81.88 |
| 6 (Br)  | 75.49  | 87.57  | 84.18  | 83.75  | 80.43 | 81.59 | 82.31 |
| 7 (Br)  | 88.52  | 87.83  | 85.63  | 85.56  | 80.5  | 81.45 | 84.16 |
| 8 (Br)  | 88.16  | 87.8   | 85.54  | 85.6   | 80.36 | 81.52 | 83.85 |
| 9 (Br)  | 88.24  | 87.77  | 84.07  | 83.47  | 79.82 | 80.45 | 84.2  |
| 10 (Br) | 85.87  | 87.6   | 90.36  | 93.17  | 79.71 | 80.62 | 81.81 |
| 11 (Br) | 85.76  | 87.93  | 86.13  | 86.28  | 79.57 | 80.53 | 81.63 |
| 12 (Br) | 86.2   | 88.64  | 86.78  | 86.97  | 80.57 | 81.81 | 82.48 |

|         |       |       |       |       |       |       |       |
|---------|-------|-------|-------|-------|-------|-------|-------|
| 13 (Br) | 86.02 | 88.5  | 86.49 | 86.67 | 80.27 | 81.49 | 82.23 |
| 14 (Br) | 77.45 | 79.79 | 77.49 | 77.57 | 70.5  | 71.67 | 73.69 |
| 15 (Br) | 78.66 | 93.36 | 90.92 | 92.97 | 81.51 | 82.59 | 83.01 |
| 16 (Br) | 77.31 | 92.72 | 89.4  | 91.55 | 80.49 | 81.71 | 82.22 |
| 17 (Br) | 77.32 | 92.52 | 89.57 | 91.69 | 80.16 | 81.48 | 81.96 |
| 18 (Br) | 77.26 | 91.94 | 89.13 | 91.16 | 79.68 | 80.77 | 81.61 |
| 19 (Br) | 51.61 | 60.67 | 55.76 | 57.36 | 51.4  | 51.1  | 52.8  |
| 20 (Br) | 82.65 | 91.93 | 89.86 | 89.99 | 84.73 | 86.24 | 87.14 |
| 21 (Br) | 78.97 | 90.74 | 88.74 | 90.41 | 81.03 | 82.08 | 82.96 |
| 22 (Br) | 77.7  | 86.92 | 84.32 | 83.81 | 79.62 | 80.84 | 81.56 |
| 23 (Br) | 79.09 | 91.04 | 88.8  | 90.43 | 81.03 | 81.98 | 83.02 |
| 24 (Br) | 57.01 | 62.34 | 58.81 | 60.57 | 54.93 | 53.74 | 57.4  |
| 25 (Br) | 80.41 | 89.2  | 85.97 | 85.47 | 82.24 | 83.32 | 83.97 |
| 26 (Br) | 78.23 | 91.36 | 83.93 | 83.49 | 79.91 | 81.01 | 81.78 |
| 27 (Br) | 79.92 | 92.85 | 85.46 | 84.99 | 81.46 | 82.42 | 83.38 |

**Table S2.** Predicted  $\Delta_f H_{298}$  of the studied Cl- and Br- PAHs using various theoretical methods.

(kcal mol<sup>-1</sup>)

| No.    | G4    | CBS-<br>QB3 | G3    | G3MP2 | M06-<br>2X/cc-<br>pVTZ | $\omega$ B97X-<br>D/ cc-<br>pVTZ | B2PLYP-<br>D3/ cc-<br>pVTZ | GA    |
|--------|-------|-------------|-------|-------|------------------------|----------------------------------|----------------------------|-------|
| 1 (Cl) | 12.81 | 11.99       | 18.48 | 16.60 | 11.46                  | 14.58                            | 15.46                      | 12.7  |
| 2 (Cl) | 8.59  | 3.55        | 11.48 | 9.77  | 3.32                   | 6.68                             | 8.33                       | 4.71  |
| 3 (Cl) | 9.54  | 3.43        | 11.54 | 9.87  | 4.13                   | 6.92                             | 8.87                       | 4.71  |
| 4 (Cl) | 9.74  | 4.51        | 11.79 | 10.11 | 4.30                   | 7.11                             | 9.10                       | 4.71  |
| 5 (Cl) | 27.85 | 28.29       | 36.76 | 33.98 | 27.50                  | 32.66                            | 31.38                      | 27.92 |
| 6 (Cl) | 27.88 | 28.28       | 36.70 | 33.92 | 27.03                  | 31.90                            | 30.99                      | 27.92 |
| 7 (Cl) | 35.25 | 47.54       | 58.52 | 54.74 | 47.09                  | 54.09                            | 50.49                      | 43.14 |
| 8 (Cl) | 35.20 | 47.62       | 58.61 | 54.78 | 47.09                  | 53.63                            | 50.37                      | 43.14 |

|         |       |       |       |       |       |       |       |       |
|---------|-------|-------|-------|-------|-------|-------|-------|-------|
| 9 (Cl)  | 35.67 | 47.90 | 58.95 | 16.60 | 47.95 | 55.26 | 51.09 | 43.14 |
| 10 (Cl) | 30.06 | 42.32 | 53.28 | 9.77  | 41.32 | 48.15 | 45.26 | 40.94 |
| 11 (Cl) | 30.27 | 42.45 | 53.38 | 9.87  | 41.13 | 48.10 | 45.26 | 40.94 |
| 12 (Cl) | 29.87 | 42.11 | 53.06 | 10.11 | 40.62 | 47.09 | 44.68 | 40.94 |
| 13 (Cl) | 29.79 | 25.04 | 52.94 | 33.98 | 40.59 | 47.06 | 44.56 | 40.94 |
| 14 (Cl) | 36.28 | 31.24 | 59.92 | 33.92 | 47.75 | 54.67 | 51.44 | 40.94 |
| 15 (Cl) | 24.96 | 20.00 | 47.15 | 54.74 | 35.66 | 40.06 | 41.22 | 35.09 |
| 16 (Cl) | 26.08 | 21.22 | 48.37 | 54.78 | 36.67 | 40.93 | 42.18 | 35.09 |
| 17 (Cl) | 26.11 | 37.47 | 48.39 | 55.19 | 36.76 | 40.93 | 42.24 | 35.09 |
| 18 (Cl) | 26.24 | 37.50 | 48.41 | 49.63 | 37.25 | 41.80 | 42.59 | 35.09 |
| 19 (Cl) | 21.11 | 38.96 | 49.70 | 49.70 | 38.99 | 43.23 | 43.84 | 33.33 |
| 20 (Cl) | 44.44 | 55.44 | 64.15 | 49.70 | 56.00 | 61.01 | 58.99 | 44.97 |
| 21 (Cl) | 43.93 | 54.91 | 63.54 | 49.39 | 55.43 | 60.70 | 58.42 | 44.63 |
| 22 (Cl) | 45.13 | 55.97 | 64.64 | 49.28 | 56.49 | 61.67 | 59.58 | 44.63 |
| 23 (Cl) | 44.51 | 55.32 | 64.03 | 56.31 | 55.97 | 61.41 | 59.10 | 44.63 |
| 24 (Cl) | 13.29 | 30.57 | 40.98 | 44.04 | 30.16 | 33.55 | 35.05 | 20.57 |
| 25 (Cl) | 17.89 | 29.02 | 39.14 | 44.04 | 28.89 | 32.47 | 34.34 | 21.76 |
| 26 (Cl) | 18.97 | 30.11 | 40.20 | 45.24 | 29.82 | 33.31 | 35.22 | 21.76 |
| 27 (Cl) | 18.71 | 28.75 | 39.96 | 45.25 | 29.77 | 33.51 | 35.16 | 21.76 |
| 1 (Br)  | 24.76 | 21.63 | 29.96 | 45.32 | 24.16 | 25.22 | 23.86 | 22.01 |
| 2 (Br)  | 15.97 | 15.79 | 22.88 | 61.07 | 15.99 | 17.34 | 16.68 | 14.02 |
| 3 (Br)  | 21.60 | 13.75 | 22.94 | 60.44 | 16.75 | 17.54 | 17.25 | 14.02 |
| 4 (Br)  | 16.94 | 16.22 | 23.18 | 61.48 | 16.92 | 17.67 | 17.42 | 14.02 |
| 5 (Br)  | 39.75 | 38.10 | 48.13 | 60.90 | 40.33 | 43.46 | 39.85 | 37.23 |
| 6 (Br)  | 39.70 | 37.65 | 47.99 | 36.66 | 39.66 | 42.44 | 39.27 | 37.23 |
| 7 (Br)  | 65.19 | 57.29 | 69.84 | 37.72 | 59.83 | 64.61 | 58.62 | 52.45 |
| 8 (Br)  | 65.24 | 57.02 | 69.85 | 37.45 | 59.65 | 64.17 | 58.59 | 52.45 |
| 9 (Br)  | 65.87 | 58.28 | 70.43 | 28.59 | 61.13 | 66.31 | 59.58 | 52.45 |
| 10 (Br) | 60.15 | 52.11 | 64.67 | 21.73 | 54.11 | 58.90 | 53.64 | 50.25 |
| 11 (Br) | 60.42 | 52.31 | 64.83 | 21.79 | 54.38 | 59.10 | 53.86 | 50.25 |

|         |       |       |       |       |       |       |       |       |
|---------|-------|-------|-------|-------|-------|-------|-------|-------|
| 12 (Br) | 59.90 | 51.54 | 64.36 | 22.01 | 53.29 | 57.68 | 53.01 | 50.25 |
| 13 (Br) | 59.84 | 51.44 | 64.24 | 45.94 | 53.34 | 57.73 | 53.04 | 50.25 |
| 14 (Br) | 67.11 | 58.85 | 71.93 | 45.75 | 61.61 | 66.41 | 60.69 | 50.25 |
| 15 (Br) | 53.88 | 45.77 | 58.21 | 66.67 | 48.25 | 50.57 | 49.41 | 44.4  |
| 16 (Br) | 55.37 | 46.77 | 59.70 | 66.63 | 49.30 | 51.45 | 50.45 | 44.4  |
| 17 (Br) | 55.40 | 46.83 | 59.70 | 67.34 | 49.62 | 51.68 | 50.66 | 44.4  |
| 18 (Br) | 55.57 | 47.47 | 59.93 | 61.62 | 50.25 | 52.70 | 51.13 | 44.4  |
| 19 (Br) | 48.43 | 44.65 | 59.30 | 61.75 | 50.05 | 52.26 | 50.47 | 44.24 |
| 20 (Br) | 71.14 | 64.70 | 75.07 | 61.75 | 68.19 | 71.28 | 66.98 | 56.96 |
| 21 (Br) | 70.95 | 64.24 | 74.67 | 61.23 | 68.05 | 71.27 | 66.66 | 53.94 |
| 22 (Br) | 72.28 | 65.34 | 75.94 | 61.13 | 69.23 | 72.32 | 67.97 | 53.94 |
| 23 (Br) | 71.46 | 64.71 | 75.21 | 68.92 | 68.60 | 71.96 | 67.29 | 53.94 |
| 24 (Br) | 39.74 | 37.44 | 50.88 | 55.68 | 42.31 | 43.87 | 42.80 | 31.48 |
| 25 (Br) | 45.89 | 38.25 | 50.13 | 55.68 | 41.22 | 42.77 | 42.35 | 31.07 |
| 26 (Br) | 47.35 | 39.50 | 51.52 | 57.09 | 42.54 | 43.96 | 43.58 | 31.07 |
| 27 (Br) | 46.88 | 39.21 | 51.12 | 57.10 | 42.31 | 43.98 | 43.30 | 31.07 |

### optimized geometry at M06-2X/6-311++G(d,p) level

#### PAH Radical

No. 1

|   |          |          |    |
|---|----------|----------|----|
| C | 0.       | 1.3208   | 0. |
| C | -1.20923 | 0.63016  | 0. |
| C | -1.22059 | -0.76799 | 0. |
| C | 0.       | -1.39708 | 0. |
| C | 1.22059  | -0.768   | 0. |
| C | 1.20923  | 0.63017  | 0. |
| H | 0.       | 2.40406  | 0. |
| H | -2.14665 | 1.17483  | 0. |
| H | -2.15252 | -1.32107 | 0. |
| H | 2.15252  | -1.32106 | 0. |

|   |         |         |    |
|---|---------|---------|----|
| H | 2.14666 | 1.17482 | 0. |
|---|---------|---------|----|

No. 2

|   |          |          |          |
|---|----------|----------|----------|
| C | 1.15386  | 1.17974  | -0.00001 |
| C | -0.23951 | 1.15192  | 0.       |
| C | -0.94058 | -0.0601  | 0.00001  |
| C | -0.15202 | -1.19146 | 0.       |
| C | 1.21851  | -1.23075 | 0.       |
| C | 1.88732  | -0.0018  | -0.00001 |
| H | 1.66861  | 2.13306  | -0.00001 |
| H | -0.79859 | 2.0826   | 0.       |
| H | 1.76519  | -2.16668 | 0.       |
| H | 2.97087  | 0.02498  | -0.00001 |
| C | -2.44582 | -0.12214 | 0.00001  |
| H | -2.81094 | -0.65342 | -0.88111 |
| H | -2.81093 | -0.65341 | 0.88113  |
| H | -2.87477 | 0.88042  | 0.00001  |

No. 3

|   |          |          |          |
|---|----------|----------|----------|
| C | -1.313   | 1.0692   | 0.00192  |
| C | 0.07629  | 1.15343  | -0.00925 |
| C | 0.87732  | 0.00897  | -0.01162 |
| C | 0.2508   | -1.24566 | -0.00928 |
| C | -1.12115 | -1.27514 | 0.00274  |
| C | -1.94544 | -0.17711 | 0.00857  |
| H | -1.9093  | 1.97489  | 0.00138  |
| H | 0.55105  | 2.12871  | -0.01809 |
| H | -3.02541 | -0.26155 | 0.0143   |
| C | 2.38059  | 0.11431  | 0.00969  |
| H | 2.7492   | 0.1355   | 1.03892  |
| H | 2.84212  | -0.73776 | -0.49142 |

|   |         |          |          |
|---|---------|----------|----------|
| H | 2.7171  | 1.02736  | -0.4835  |
| H | 0.84279 | -2.15508 | -0.01826 |

No. 4

|   |          |          |          |
|---|----------|----------|----------|
| C | -1.26979 | 1.21529  | 0.00277  |
| C | 0.12809  | 1.20336  | -0.00812 |
| C | 0.84015  | 0.00268  | -0.01074 |
| C | 0.13177  | -1.20145 | -0.00822 |
| C | -1.26489 | -1.21851 | 0.00281  |
| C | -1.90249 | -0.00232 | 0.0089   |
| H | -1.819   | 2.14962  | 0.00213  |
| H | 0.66915  | 2.14442  | -0.01685 |
| C | 2.34806  | 0.00126  | 0.00841  |
| H | 2.72233  | -0.10995 | 1.02975  |
| H | 2.7484   | -0.82421 | -0.58246 |
| H | 2.74799  | 0.93339  | -0.39275 |
| H | 0.67676  | -2.14047 | -0.01696 |
| H | -1.811   | -2.15465 | 0.00232  |

No. 5

|   |          |          |          |
|---|----------|----------|----------|
| C | 2.3886   | 0.72861  | 0.       |
| C | 1.18932  | 1.3898   | -0.00001 |
| C | -0.035   | 0.67212  | 0.       |
| C | 0.01398  | -0.75429 | 0.       |
| C | 1.26994  | -1.41419 | 0.       |
| C | 2.4298   | -0.68679 | 0.       |
| H | -1.32385 | 2.40558  | -0.00001 |
| H | 3.31603  | 1.28883  | -0.00001 |
| H | 1.15732  | 2.47415  | -0.00001 |
| C | -1.29925 | 1.32146  | 0.       |
| C | -1.2245  | -1.41049 | 0.00001  |

|   |          |          |         |
|---|----------|----------|---------|
| H | 1.28875  | -2.49756 | 0.00001 |
| H | 3.38761  | -1.19302 | 0.      |
| C | -2.43974 | -0.81877 | 0.      |
| C | -2.46685 | 0.60498  | 0.      |
| H | -3.36121 | -1.3892  | 0.00001 |
| H | -3.42238 | 1.11661  | 0.      |

No. 6

|   |          |          |    |
|---|----------|----------|----|
| C | 2.33743  | -0.78902 | 0. |
| C | 1.12447  | -1.42413 | 0. |
| C | -0.08555 | -0.68225 | 0. |
| C | -0.01873 | 0.73938  | 0. |
| C | 1.25237  | 1.36986  | 0. |
| C | 2.40138  | 0.62464  | 0. |
| H | -1.38827 | -2.41011 | 0. |
| H | 3.25406  | -1.36648 | 0. |
| H | 1.07068  | -2.50754 | 0. |
| C | -1.35298 | -1.32539 | 0. |
| C | -1.23359 | 1.48877  | 0. |
| H | 1.29664  | 2.45347  | 0. |
| H | 3.36726  | 1.11578  | 0. |
| C | -2.39359 | 0.79646  | 0. |
| C | -2.51698 | -0.59493 | 0. |
| H | -3.48625 | -1.07876 | 0. |
| H | -1.19946 | 2.57326  | 0. |

No. 7

|   |         |          |          |
|---|---------|----------|----------|
| C | 3.69092 | 0.63193  | 0.       |
| C | 2.52426 | 1.33432  | 0.00001  |
| C | 1.25369 | 0.67229  | 0.       |
| C | 1.22113 | -0.76806 | -0.00001 |



|   |          |          |          |
|---|----------|----------|----------|
| C | 2.47976  | -1.4093  | -0.00002 |
| C | 3.67976  | -0.80439 | -0.00001 |
| C | 0.04551  | 1.36902  | 0.00001  |
| C | -0.00234 | -1.43683 | -0.00002 |
| C | -1.20617 | -0.73111 | -0.00001 |
| C | -1.18148 | 0.70325  | 0.00001  |
| C | -2.42517 | 1.41029  | 0.00002  |
| H | -2.40293 | 2.49473  | 0.00003  |
| C | -3.60963 | 0.73965  | 0.00002  |
| C | -3.63387 | -0.68741 | 0.       |
| C | -2.47236 | -1.39688 | -0.00001 |
| H | 0.05982  | 2.45486  | 0.00002  |
| H | 4.64264  | 1.15049  | 0.00001  |
| H | 2.53724  | 2.41858  | 0.00002  |
| H | 4.60993  | -1.36059 | -0.00002 |
| H | -0.01326 | -2.52144 | -0.00003 |
| H | -4.54502 | 1.28643  | 0.00003  |
| H | -4.58716 | -1.20221 | 0.       |
| H | -2.48531 | -2.48141 | -0.00002 |

No. 8

|   |          |          |          |
|---|----------|----------|----------|
| C | 3.71873  | -0.65975 | -0.00001 |
| C | 2.54339  | -1.35512 | 0.       |
| C | 1.28168  | -0.6761  | 0.       |
| C | 1.25472  | 0.76027  | -0.00001 |
| C | 2.50543  | 1.4724   | -0.00002 |
| C | 3.63507  | 0.74604  | -0.00002 |
| C | 0.07556  | -1.37716 | 0.00001  |
| C | 0.02667  | 1.4208   | -0.00001 |
| C | -1.17851 | 0.71637  | 0.       |
| C | -1.15382 | -0.71702 | 0.00001  |

|   |          |          |          |
|---|----------|----------|----------|
| C | -2.39586 | -1.42661 | 0.00002  |
| H | -2.37171 | -2.51107 | 0.00002  |
| C | -3.58138 | -0.75789 | 0.00002  |
| C | -3.60617 | 0.66917  | 0.00001  |
| C | -2.44554 | 1.38045  | 0.       |
| H | 0.09354  | -2.46286 | 0.00001  |
| H | 4.67564  | -1.16731 | -0.00001 |
| H | 2.54728  | -2.44032 | 0.00001  |
| H | 0.00789  | 2.50624  | -0.00002 |
| H | -4.51623 | -1.30548 | 0.00002  |
| H | -4.55992 | 1.18326  | 0.00001  |
| H | -2.46058 | 2.46501  | 0.       |
| H | 2.50428  | 2.55742  | -0.00003 |

No. 9

|   |          |          |          |
|---|----------|----------|----------|
| C | -3.6503  | -0.68198 | -0.00003 |
| C | -2.47845 | -1.37496 | -0.00005 |
| C | -1.2213  | -0.69265 | -0.00003 |
| C | -1.23209 | 0.7487   | 0.00003  |
| C | -2.48353 | 1.44118  | 0.00005  |
| C | -3.65349 | 0.7456   | 0.00003  |
| C | 0.       | -1.37067 | -0.00005 |
| C | 0.       | 1.36643  | 0.00005  |
| C | 1.23208  | 0.7487   | 0.00003  |
| C | 1.2213   | -0.69266 | -0.00003 |
| C | 2.47845  | -1.37497 | -0.00005 |
| H | 2.4765   | -2.45973 | -0.00009 |
| C | 3.6503   | -0.68199 | -0.00002 |
| C | 3.65348  | 0.74561  | 0.00003  |
| C | 2.48353  | 1.44118  | 0.00005  |
| H | 0.       | -2.45608 | -0.00009 |

|   |          |          |          |
|---|----------|----------|----------|
| H | -4.59466 | -1.21311 | -0.00005 |
| H | -2.4765  | -2.45973 | -0.00009 |
| H | 4.59466  | -1.21311 | -0.00004 |
| H | 4.59936  | 1.27376  | 0.00005  |
| H | 2.47421  | 2.52458  | 0.00009  |
| H | -2.47422 | 2.52458  | 0.00009  |
| H | -4.59935 | 1.27376  | 0.00005  |

No. 10

|   |          |          |          |
|---|----------|----------|----------|
| C | 3.53251  | -0.31321 | -0.00001 |
| C | 2.83291  | 0.87087  | 0.00001  |
| C | 1.42334  | 0.87844  | 0.00002  |
| C | 0.71058  | -0.34661 | -0.00001 |
| C | 1.45722  | -1.54365 | -0.00004 |
| C | 2.83451  | -1.53108 | -0.00004 |
| C | 0.70091  | 2.13152  | 0.00004  |
| C | -0.74828 | -0.33533 | 0.       |
| C | -1.43236 | 0.90941  | 0.00001  |
| C | -0.63211 | 2.07999  | 0.00003  |
| C | -2.84128 | 0.95251  | 0.00001  |
| C | -3.57195 | -0.21214 | 0.       |
| C | -2.90762 | -1.44969 | -0.00001 |
| C | -1.53124 | -1.50855 | -0.00001 |
| H | 1.25542  | 3.06404  | 0.00005  |
| H | 4.61587  | -0.30775 | -0.00001 |
| H | 3.35753  | 1.82014  | 0.00003  |
| H | 0.94882  | -2.49857 | -0.00006 |
| H | 3.38043  | -2.46684 | -0.00006 |
| H | -3.3301  | 1.9196   | 0.00003  |
| H | -4.6546  | -0.17786 | 0.       |
| H | -3.48222 | -2.36826 | -0.00002 |

|   |          |          |          |
|---|----------|----------|----------|
| H | -1.05403 | -2.47953 | -0.00002 |
|---|----------|----------|----------|

No. 11

|   |          |          |          |
|---|----------|----------|----------|
| C | 3.50361  | -0.35643 | -0.00007 |
| C | 2.81086  | 0.83103  | -0.00001 |
| C | 1.40027  | 0.84911  | 0.00001  |
| C | 0.68441  | -0.37207 | -0.00003 |
| C | 1.42074  | -1.57574 | -0.00009 |
| C | 2.79772  | -1.57064 | -0.00011 |
| C | 0.69205  | 2.09991  | 0.00006  |
| C | -0.77117 | -0.33932 | 0.       |
| C | -1.42188 | 0.92356  | 0.00005  |
| C | -0.65853 | 2.14013  | 0.00007  |
| C | -2.8144  | 0.9114   | 0.00007  |
| C | -3.60952 | -0.18856 | 0.00006  |
| C | -2.94868 | -1.43683 | 0.00002  |
| C | -1.57222 | -1.50309 | -0.00001 |
| H | 1.2718   | 3.01646  | 0.00008  |
| H | 4.58692  | -0.35814 | -0.00009 |
| H | 3.34175  | 1.77696  | 0.00002  |
| H | 0.90519  | -2.52682 | -0.00013 |
| H | 3.33846  | -2.50951 | -0.00016 |
| H | -1.19444 | 3.08171  | 0.0001   |
| H | -4.69114 | -0.12653 | 0.00008  |
| H | -3.53258 | -2.3501  | 0.00001  |
| H | -1.10548 | -2.47872 | -0.00003 |

No. 12

|   |          |          |          |
|---|----------|----------|----------|
| C | -3.49519 | -0.28516 | 0.00001  |
| C | -2.77043 | 0.88272  | -0.00001 |
| C | -1.35982 | 0.86181  | -0.00001 |

|   |          |          |          |
|---|----------|----------|----------|
| C | -0.67435 | -0.37636 | 0.00001  |
| C | -1.44438 | -1.55915 | 0.00004  |
| C | -2.82072 | -1.51705 | 0.00004  |
| C | -0.61676 | 2.09091  | -0.00001 |
| C | 0.78278  | -0.38083 | -0.00001 |
| C | 1.47164  | 0.85747  | 0.00001  |
| C | 0.73448  | 2.09007  | 0.00001  |
| C | 2.88957  | 0.875    | 0.00001  |
| C | 3.53695  | -0.31746 | -0.00001 |
| C | 2.91909  | -1.55841 | -0.00004 |
| C | 1.53671  | -1.57551 | -0.00004 |
| H | -1.16899 | 3.0245   | -0.00002 |
| H | -4.57813 | -0.2584  | 0.00001  |
| H | -3.27489 | 1.84304  | -0.00003 |
| H | -0.9575  | -2.52512 | 0.00008  |
| H | -3.3858  | -2.44151 | 0.00007  |
| H | 1.29051  | 3.02109  | 0.00002  |
| H | 3.48639  | -2.48131 | -0.00008 |
| H | 1.03601  | -2.53483 | -0.00008 |
| H | 3.41484  | 1.8242   | 0.00002  |

No. 13

|   |          |          |          |
|---|----------|----------|----------|
| C | -3.51916 | -0.21332 | -0.00005 |
| C | -2.76184 | 0.93393  | -0.00009 |
| C | -1.3523  | 0.87329  | -0.00006 |
| C | -0.70563 | -0.38553 | 0.       |
| C | -1.50748 | -1.54657 | 0.00005  |
| C | -2.8819  | -1.46511 | 0.00002  |
| C | -0.57174 | 2.07905  | -0.00009 |
| C | 0.749    | -0.43293 | 0.00003  |
| C | 1.48086  | 0.78032  | 0.       |

|   |          |          |          |
|---|----------|----------|----------|
| C | 0.77873  | 2.03413  | -0.00005 |
| C | 2.89315  | 0.76163  | 0.00003  |
| C | 3.59336  | -0.428   | 0.00007  |
| C | 2.83272  | -1.58705 | 0.00009  |
| C | 1.47573  | -1.65128 | 0.00006  |
| H | -1.09429 | 3.02933  | -0.00014 |
| H | -4.60092 | -0.15507 | -0.00007 |
| H | -3.2393  | 1.90793  | -0.00014 |
| H | -1.04585 | -2.52508 | 0.00011  |
| H | -3.47419 | -2.3723  | 0.00006  |
| H | 1.36246  | 2.94819  | -0.00007 |
| H | 0.96895  | -2.60768 | 0.00007  |
| H | 3.4259   | 1.70715  | 0.00001  |
| H | 4.67631  | -0.44778 | 0.00009  |

No. 14

|   |          |          |          |
|---|----------|----------|----------|
| C | -3.52886 | -0.3206  | -0.00027 |
| C | -2.81955 | 0.85853  | -0.00021 |
| C | -1.40914 | 0.85154  | 0.00007  |
| C | -0.72734 | -0.38479 | 0.00028  |
| C | -1.47125 | -1.58094 | 0.00007  |
| C | -2.84764 | -1.55076 | -0.00018 |
| C | -0.65512 | 2.0762   | 0.00009  |
| C | 0.72053  | -0.38724 | 0.00048  |
| C | 1.43616  | 0.83733  | 0.0002   |
| C | 0.69814  | 2.07109  | 0.00019  |
| C | 2.84814  | 0.81615  | -0.00031 |
| C | 3.54705  | -0.37028 | -0.00055 |
| C | 2.85363  | -1.60225 | -0.00015 |
| C | 1.49618  | -1.54224 | 0.00078  |
| H | -1.20124 | 3.01343  | -0.00024 |

|   |          |          |          |
|---|----------|----------|----------|
| H | -4.61215 | -0.3037  | -0.00045 |
| H | -3.33781 | 1.81146  | -0.0005  |
| H | -0.94158 | -2.52748 | -0.00022 |
| H | -3.4092  | -2.47731 | -0.00027 |
| H | 1.25427  | 3.00236  | 0.00065  |
| H | 3.38116  | 1.76052  | -0.0003  |
| H | 4.63088  | -0.36599 | -0.00108 |
| H | 3.3901   | -2.54373 | -0.00043 |

No. 15

|   |          |          |          |
|---|----------|----------|----------|
| C | 2.94213  | -1.25018 | -0.00001 |
| C | 1.57484  | -1.50783 | 0.       |
| C | 0.69285  | -0.43206 | 0.00001  |
| C | 1.17052  | 0.88683  | 0.00001  |
| C | 2.53396  | 1.13861  | -0.00001 |
| C | 3.41838  | 0.06098  | -0.00002 |
| C | 0.01776  | 1.86491  | 0.00002  |
| C | -1.18431 | 0.94983  | -0.00003 |
| C | -0.77712 | -0.4001  | 0.00003  |
| C | -1.71461 | -1.42911 | 0.00005  |
| H | -1.39584 | -2.46509 | 0.00007  |
| C | -3.07122 | -1.11534 | 0.00001  |
| C | -3.49839 | 0.21913  | -0.00003 |
| C | -2.52989 | 1.19667  | -0.00005 |
| H | 3.64488  | -2.07489 | 0.       |
| H | 1.20703  | -2.52771 | 0.00002  |
| H | 2.91027  | 2.15583  | -0.00002 |
| H | 4.48655  | 0.24271  | -0.00003 |
| H | -3.80909 | -1.90944 | 0.00001  |
| H | -4.5546  | 0.46117  | -0.00007 |
| H | 0.03067  | 2.51161  | 0.88196  |

|   |        |         |          |
|---|--------|---------|----------|
| H | 0.0307 | 2.51172 | -0.88184 |
|---|--------|---------|----------|

No. 16

|   |          |          |          |
|---|----------|----------|----------|
| C | 2.9397   | -1.22273 | -0.00016 |
| C | 1.57689  | -1.50448 | -0.0001  |
| C | 0.67538  | -0.44519 | -0.00003 |
| C | 1.1312   | 0.88139  | -0.00001 |
| C | 2.48962  | 1.15779  | -0.00007 |
| C | 3.39343  | 0.09613  | -0.00015 |
| C | -0.04102 | 1.83572  | 0.0001   |
| C | -1.22859 | 0.90018  | 0.00008  |
| C | -0.79493 | -0.4359  | 0.00003  |
| C | -1.70508 | -1.4894  | 0.00003  |
| H | -1.36501 | -2.5194  | -0.00001 |
| C | -3.07304 | -1.20124 | 0.00006  |
| C | -3.44137 | 0.12493  | 0.00011  |
| C | -2.58793 | 1.20436  | 0.00012  |
| H | 3.65651  | -2.03529 | -0.00022 |
| H | 1.22838  | -2.5312  | -0.00011 |
| H | 2.84756  | 2.18166  | -0.00006 |
| H | 4.45823  | 0.29651  | -0.0002  |
| H | -3.80916 | -1.99634 | 0.00006  |
| H | -0.03788 | 2.48324  | 0.88224  |
| H | -0.03794 | 2.48344  | -0.88189 |
| H | -2.94626 | 2.228    | 0.00015  |

No. 17

|   |         |          |          |
|---|---------|----------|----------|
| C | 2.9955  | -1.15111 | -0.00004 |
| C | 1.64415 | -1.48256 | 0.       |
| C | 0.70551 | -0.45599 | 0.00001  |
| C | 1.11072 | 0.88674  | -0.00001 |



|   |          |          |          |
|---|----------|----------|----------|
| C | 2.45849  | 1.21217  | -0.00005 |
| C | 3.39993  | 0.18398  | -0.00006 |
| C | -0.09585 | 1.79691  | 0.00003  |
| C | -1.24982 | 0.82013  | 0.00002  |
| C | -0.76363 | -0.49774 | 0.00002  |
| C | -1.64187 | -1.58532 | 0.00003  |
| H | -1.28649 | -2.60966 | 0.00004  |
| C | -2.97783 | -1.26707 | 0.00003  |
| C | -3.51057 | 0.00211  | 0.00001  |
| C | -2.61323 | 1.07767  | 0.00001  |
| H | 3.74189  | -1.93654 | -0.00005 |
| H | 1.33283  | -2.52116 | 0.00001  |
| H | 2.77904  | 2.24833  | -0.00006 |
| H | 4.45676  | 0.42309  | -0.00009 |
| H | -0.11269 | 2.44454  | 0.88198  |
| H | -0.11272 | 2.44467  | -0.88182 |
| H | -2.98681 | 2.09643  | 0.       |
| H | -4.58087 | 0.17074  | 0.       |

No. 18

|   |          |          |          |
|---|----------|----------|----------|
| C | 3.00814  | -1.211   | -0.00016 |
| C | 1.65099  | -1.51826 | -0.00022 |
| C | 0.73476  | -0.47273 | -0.00005 |
| C | 1.16173  | 0.86299  | 0.00018  |
| C | 2.51531  | 1.16296  | 0.00023  |
| C | 3.43697  | 0.11655  | 0.00006  |
| C | -0.02909 | 1.79507  | 0.00038  |
| C | -1.20298 | 0.84074  | 0.00015  |
| C | -0.73249 | -0.48799 | -0.00011 |
| C | -1.66947 | -1.49211 | -0.00032 |
| C | -3.02593 | -1.2783  | -0.00032 |

|   |          |          |          |
|---|----------|----------|----------|
| C | -3.47295 | 0.04998  | -0.00008 |
| C | -2.56429 | 1.10862  | 0.00015  |
| H | 3.7402   | -2.00983 | -0.0003  |
| H | 1.31149  | -2.54791 | -0.00041 |
| H | 2.85558  | 2.19278  | 0.00041  |
| H | 4.49806  | 0.33598  | 0.0001   |
| H | -0.03723 | 2.44227  | 0.88275  |
| H | -0.0372  | 2.44278  | -0.88161 |
| H | -2.92364 | 2.13164  | 0.00033  |
| H | -4.53782 | 0.25238  | -0.00009 |
| H | -3.73357 | -2.09907 | -0.0005  |

No. 19

|   |          |          |          |
|---|----------|----------|----------|
| C | 3.01531  | -1.2118  | 0.       |
| C | 1.65659  | -1.5199  | 0.00001  |
| C | 0.73417  | -0.47597 | 0.00001  |
| C | 1.16486  | 0.86424  | 0.       |
| C | 2.51937  | 1.1634   | -0.00001 |
| C | 3.44428  | 0.11713  | -0.00001 |
| C | -0.02882 | 1.79694  | 0.00001  |
| C | -1.20617 | 0.84236  | 0.00001  |
| C | -0.73026 | -0.49253 | 0.       |
| C | -1.67586 | -1.49022 | 0.       |
| C | -3.03418 | -1.28077 | -0.00001 |
| C | -3.48114 | 0.05091  | -0.00001 |
| C | -2.56838 | 1.10822  | 0.       |
| H | 3.74841  | -2.01188 | 0.       |
| H | 1.3205   | -2.55128 | 0.00002  |
| H | 2.86062  | 2.19429  | -0.00002 |
| H | 4.50648  | 0.33882  | -0.00002 |
| H | -0.03713 | 2.45508  | -0.87853 |

|   |          |          |          |
|---|----------|----------|----------|
| H | -2.92816 | 2.13251  | -0.00001 |
| H | -4.54736 | 0.25584  | -0.00002 |
| H | -3.74485 | -2.10054 | -0.00001 |
| H | -1.32954 | -2.50262 | 0.00001  |

No. 20

|   |          |          |          |
|---|----------|----------|----------|
| C | -0.90727 | 2.32061  | -0.00009 |
| C | -1.23678 | 0.87367  | -0.00003 |
| C | -0.0002  | 0.18325  | -0.00001 |
| C | 1.08464  | 1.09564  | -0.00005 |
| C | 0.43309  | 2.40653  | -0.00006 |
| C | 0.13819  | -1.19854 | 0.00004  |
| C | 2.36193  | 0.59557  | -0.00004 |
| C | 2.53499  | -0.81709 | 0.00001  |
| C | 1.47222  | -1.69402 | 0.00004  |
| C | -2.38884 | 0.12881  | 0.00002  |
| C | -2.28409 | -1.29344 | 0.00007  |
| C | -1.07381 | -1.94816 | 0.00008  |
| H | -3.19793 | -1.87597 | 0.0001   |
| H | -1.04005 | -3.03211 | 0.00011  |
| H | 1.65104  | -2.76376 | 0.00008  |
| H | -1.62114 | 3.13121  | -0.0001  |
| H | 3.22935  | 1.24493  | -0.00006 |
| H | 3.54387  | -1.21232 | 0.00002  |
| H | -3.36956 | 0.59105  | 0.00001  |

No. 21

|   |          |         |          |
|---|----------|---------|----------|
| C | 0.38979  | 2.44294 | -0.00011 |
| C | 1.06083  | 1.13191 | -0.00011 |
| C | 0.02402  | 0.1588  | -0.00001 |
| C | -1.23333 | 0.80281 | 0.00005  |
| C | -0.95169 | 2.24876 | -0.00001 |

|   |          |          |          |
|---|----------|----------|----------|
| C | 0.21567  | -1.21812 | 0.00003  |
| C | -2.35877 | 0.01423  | 0.00014  |
| C | -2.20365 | -1.40032 | 0.0002   |
| C | -0.96739 | -2.00909 | 0.00014  |
| C | 2.3146   | 0.61429  | -0.00017 |
| C | 2.60117  | -0.76191 | -0.00014 |
| C | 1.56531  | -1.67599 | -0.00004 |
| H | 3.62932  | -1.10455 | -0.00019 |
| H | 1.77918  | -2.73958 | -0.00002 |
| H | -0.8942  | -3.09117 | 0.00017  |
| H | 0.89933  | 3.39534  | -0.00018 |
| H | -3.35555 | 0.44144  | 0.0002   |
| H | -3.09438 | -2.01733 | 0.00028  |
| H | -1.70295 | 3.02601  | 0.00001  |

No. 22

|   |          |          |          |
|---|----------|----------|----------|
| C | -1.1447  | 2.14658  | -0.00008 |
| C | -1.35846 | 0.68619  | 0.       |
| C | -0.06887 | 0.10216  | 0.       |
| C | 0.91753  | 1.11303  | 0.       |
| C | 0.18665  | 2.39531  | 0.00009  |
| C | 0.197    | -1.2629  | 0.       |
| C | 2.23648  | 0.73245  | -0.00003 |
| C | 2.54446  | -0.65811 | -0.00003 |
| C | 1.57166  | -1.63312 | -0.00002 |
| C | -2.45395 | -0.15061 | 0.00003  |
| C | -2.16392 | -1.52541 | 0.00003  |
| C | -0.94555 | -2.12689 | 0.00002  |
| H | -0.83233 | -3.20572 | 0.00002  |
| H | 1.85043  | -2.68107 | -0.00002 |
| H | -1.93139 | 2.88779  | -0.00014 |

|   |          |          |          |
|---|----------|----------|----------|
| H | 3.04257  | 1.45762  | -0.00001 |
| H | 3.58662  | -0.95542 | -0.00003 |
| H | 0.64982  | 3.37219  | 0.00014  |
| H | -3.47558 | 0.21254  | 0.00001  |

No. 23

|   |          |          |          |
|---|----------|----------|----------|
| C | -0.90308 | 2.22344  | 0.00013  |
| C | -1.25604 | 0.79096  | 0.00001  |
| C | -0.02586 | 0.09382  | 0.       |
| C | 1.05414  | 1.00574  | 0.00001  |
| C | 0.44602  | 2.34961  | -0.00009 |
| C | 0.11511  | -1.2942  | -0.00001 |
| C | 2.32925  | 0.49675  | 0.00004  |
| C | 2.50422  | -0.91705 | 0.00003  |
| C | 1.44571  | -1.79793 | 0.00001  |
| C | -2.42311 | 0.06584  | -0.00003 |
| C | -2.34145 | -1.36308 | -0.00005 |
| C | -1.12249 | -1.96559 | -0.00003 |
| H | 1.6192   | -2.86721 | 0.       |
| H | -1.61623 | 3.03592  | 0.00021  |
| H | 3.20166  | 1.14078  | 0.00002  |
| H | 3.51379  | -1.3107  | 0.00003  |
| H | 0.99748  | 3.27932  | -0.00016 |
| H | -3.39751 | 0.54223  | 0.       |
| H | -3.2529  | -1.95011 | -0.00005 |

No. 24

|   |         |          |         |
|---|---------|----------|---------|
| C | 3.10184 | -0.26323 | 0.00004 |
| C | 1.91715 | 0.68527  | 0.00001 |
| C | 0.72747 | -0.07271 | 0.00001 |
| C | 0.97175 | -1.4612  | 0.00001 |

|   |          |          |          |
|---|----------|----------|----------|
| C | 2.4702   | -1.69717 | 0.       |
| C | -0.56065 | 0.50853  | 0.       |
| C | -0.09968 | -2.31957 | 0.       |
| C | -1.41218 | -1.78176 | -0.00001 |
| C | -1.63517 | -0.42192 | -0.00001 |
| C | 1.83222  | 2.05573  | 0.       |
| C | 0.54823  | 2.66068  | -0.00001 |
| C | -0.61865 | 1.92484  | -0.00001 |
| H | 0.48574  | 3.74442  | -0.00002 |
| H | -1.58106 | 2.42202  | -0.00002 |
| H | 3.73965  | -0.10643 | 0.8766   |
| H | 3.73973  | -0.10641 | -0.87646 |
| H | 2.78492  | -2.27376 | 0.87653  |
| H | 2.71899  | 2.68172  | 0.       |
| H | 0.02679  | -3.39736 | 0.       |
| H | -2.26353 | -2.45238 | -0.00001 |
| H | -2.64129 | -0.05774 | -0.00002 |

No. 25

|   |          |          |          |
|---|----------|----------|----------|
| C | -1.20721 | 2.14956  | 0.00004  |
| C | -1.28613 | 0.63523  | 0.00005  |
| C | 0.02129  | 0.10861  | 0.       |
| C | 1.00616  | 1.12816  | -0.00007 |
| C | 0.31959  | 2.47967  | -0.00008 |
| C | 0.31351  | -1.26554 | 0.00001  |
| C | 2.28765  | 0.69562  | -0.00011 |
| C | 2.66292  | -0.65635 | -0.0001  |
| C | 1.68668  | -1.63239 | -0.00004 |
| C | -2.34347 | -0.23581 | 0.0001   |
| C | -2.08136 | -1.63377 | 0.00011  |
| C | -0.80387 | -2.14319 | 0.00007  |

|   |          |          |          |
|---|----------|----------|----------|
| H | -2.92184 | -2.31833 | 0.00016  |
| H | -0.64374 | -3.21571 | 0.00008  |
| H | 1.9651   | -2.6808  | -0.00003 |
| H | 3.71068  | -0.93478 | -0.00014 |
| H | -1.70396 | 2.56685  | 0.8785   |
| H | -1.70409 | 2.56686  | -0.87835 |
| H | 0.60607  | 3.06026  | -0.87874 |
| H | 0.60618  | 3.06035  | 0.8785   |
| H | -3.36897 | 0.11661  | 0.00014  |

No. 26

|   |          |          |          |
|---|----------|----------|----------|
| C | -0.03731 | 2.42617  | 0.00014  |
| C | -0.83168 | 1.13499  | 0.00008  |
| C | 0.06356  | 0.04666  | 0.       |
| C | 1.41259  | 0.46418  | -0.00003 |
| C | 1.45832  | 1.97978  | 0.00002  |
| C | -0.3484  | -1.298   | -0.00005 |
| C | 2.40591  | -0.4874  | -0.0001  |
| C | 1.96606  | -1.81943 | -0.00014 |
| C | 0.68953  | -2.27995 | -0.00011 |
| C | -2.17886 | 0.88411  | 0.0001   |
| C | -2.62158 | -0.46625 | 0.00005  |
| C | -1.74862 | -1.53025 | -0.00002 |
| H | -3.68806 | -0.66149 | 0.00007  |
| H | -2.12519 | -2.54698 | -0.00005 |
| H | 0.45317  | -3.33848 | -0.00015 |
| H | -0.2736  | 3.03038  | 0.87862  |
| H | -0.2737  | 3.03056  | -0.8782  |
| H | 1.98839  | 2.3535   | -0.87857 |
| H | 1.98854  | 2.35346  | 0.87853  |
| H | -2.90705 | 1.68731  | 0.00016  |

|   |         |         |          |
|---|---------|---------|----------|
| H | 3.46036 | -0.2359 | -0.00013 |
|---|---------|---------|----------|

No. 27

|   |          |          |          |
|---|----------|----------|----------|
| C | -0.48359 | 2.36882  | 0.00007  |
| C | -1.04857 | 0.96168  | 0.00001  |
| C | 0.0219   | 0.04486  | 0.       |
| C | 1.28222  | 0.68014  | 0.00001  |
| C | 1.06733  | 2.18181  | -0.00001 |
| C | -0.15917 | -1.35344 | -0.00002 |
| C | 2.41881  | -0.08535 | 0.00001  |
| C | 2.28857  | -1.50956 | 0.00001  |
| C | 1.05043  | -2.06611 | -0.00001 |
| C | -2.33107 | 0.47993  | -0.00001 |
| C | -2.53716 | -0.92752 | -0.00004 |
| C | -1.49733 | -1.82769 | -0.00003 |
| H | -3.55476 | -1.30112 | -0.00005 |
| H | -1.68883 | -2.89374 | -0.00005 |
| H | -0.8192  | 2.92406  | 0.87854  |
| H | -0.81927 | 2.9242   | -0.87827 |
| H | 1.52395  | 2.64259  | -0.87847 |
| H | 1.52406  | 2.64263  | 0.87838  |
| H | -3.18713 | 1.14536  | -0.00001 |
| H | 3.40802  | 0.35914  | 0.       |
| H | 3.17902  | -2.12866 | 0.       |

### Cl-PAHs

No. 1

|   |         |         |    |
|---|---------|---------|----|
| C | 2.26351 | 0.00001 | 0. |
| C | 1.56584 | 1.20352 | 0. |
| C | 0.17506 | 1.211   | 0. |



|    |          |          |          |
|----|----------|----------|----------|
| C  | -0.50399 | -0.00007 | -0.00002 |
| C  | 0.17507  | -1.21101 | -0.00001 |
| C  | 1.56596  | -1.20345 | 0.00001  |
| H  | 3.34634  | 0.0001   | 0.       |
| H  | 2.10283  | 2.14422  | 0.       |
| H  | -0.37974 | 2.14037  | 0.       |
| H  | -0.37955 | -2.14048 | 0.       |
| H  | 2.10289  | -2.14418 | 0.00003  |
| Cl | -2.2495  | 0.       | 0.00001  |

No. 2

|    |          |          |          |
|----|----------|----------|----------|
| C  | -2.36554 | 0.07256  | -0.00004 |
| C  | -1.47285 | 1.13765  | -0.00003 |
| C  | -0.09109 | 0.93797  | 0.00004  |
| C  | 0.35563  | -0.38474 | -0.00001 |
| C  | -0.51667 | -1.46457 | 0.00007  |
| C  | -1.8867  | -1.23223 | 0.00004  |
| H  | -3.43203 | 0.26195  | -0.00027 |
| H  | -1.84868 | 2.15502  | -0.00009 |
| H  | -0.11961 | -2.47174 | 0.00018  |
| H  | -2.5725  | -2.07054 | 0.00004  |
| C  | 0.86664  | 2.096    | 0.00008  |
| H  | 1.51512  | 2.06555  | 0.8787   |
| H  | 1.51512  | 2.06558  | -0.87862 |
| H  | 0.32302  | 3.04039  | -0.00002 |
| Cl | 2.07548  | -0.70718 | -0.00005 |

No. 3

|   |         |          |          |
|---|---------|----------|----------|
| C | 0.65525 | 1.87734  | 0.00244  |
| C | 1.72555 | 0.99011  | -0.00841 |
| C | 1.51022 | -0.38821 | -0.01143 |

|    |          |          |          |
|----|----------|----------|----------|
| C  | 0.19808  | -0.86176 | -0.00976 |
| C  | -0.86033 | 0.035    | 0.00066  |
| C  | -0.65292 | 1.4073   | 0.00744  |
| H  | 0.8374   | 2.94542  | 0.0032   |
| H  | 2.74112  | 1.37028  | -0.01627 |
| H  | -1.49707 | 2.08437  | 0.0126   |
| C  | 2.66568  | -1.35493 | 0.00945  |
| H  | 2.91085  | -1.63623 | 1.03728  |
| H  | 2.42573  | -2.26811 | -0.53702 |
| H  | 3.55663  | -0.91086 | -0.43618 |
| H  | -0.0025  | -1.92679 | -0.01812 |
| Cl | -2.49537 | -0.5816  | 0.00072  |

No. 4

|    |          |          |          |
|----|----------|----------|----------|
| C  | -0.3093  | 1.20808  | -0.00254 |
| C  | 1.08122  | 1.19796  | -0.00903 |
| C  | 1.79817  | 0.00196  | -0.00951 |
| C  | 1.08193  | -1.19569 | -0.00911 |
| C  | -0.30751 | -1.20737 | -0.00253 |
| C  | -0.99134 | 0.00042  | 0.00117  |
| H  | -0.86054 | 2.13979  | -0.00421 |
| H  | 1.6163   | 2.14155  | -0.01581 |
| C  | 3.30462  | -0.00124 | 0.01276  |
| H  | 3.67579  | -0.11295 | 1.03519  |
| H  | 3.70483  | -0.82773 | -0.57679 |
| H  | 3.70642  | 0.93059  | -0.38738 |
| H  | 1.61853  | -2.13862 | -0.0158  |
| H  | -0.85809 | -2.13948 | -0.0042  |
| Cl | -2.73824 | -0.00105 | 0.00481  |

No. 5

|    |          |          |         |
|----|----------|----------|---------|
| C  | -2.9168  | -0.60795 | 0.      |
| C  | -2.3997  | 0.65896  | 0.      |
| C  | -0.99716 | 0.87441  | 0.      |
| C  | -0.12859 | -0.25371 | 0.      |
| C  | -0.69189 | -1.55565 | 0.      |
| C  | -2.05091 | -1.72565 | 0.      |
| H  | -1.1328  | 3.03019  | 0.      |
| H  | -3.98943 | -0.75996 | 0.      |
| H  | -3.05469 | 1.52352  | 0.      |
| C  | -0.45396 | 2.1848   | 0.      |
| C  | 1.27165  | 0.00057  | 0.      |
| H  | -0.03423 | -2.41484 | 0.      |
| H  | -2.46749 | -2.72575 | 0.00001 |
| C  | 1.77862  | 1.27048  | 0.      |
| C  | 0.89995  | 2.37711  | 0.      |
| H  | 2.85045  | 1.42063  | 0.      |
| H  | 1.31345  | 3.37816  | 0.00001 |
| Cl | 2.39102  | -1.34071 | 0.      |

No. 6

|   |          |          |          |
|---|----------|----------|----------|
| C | 3.32675  | 0.21525  | -0.00005 |
| C | 2.34466  | 1.1694   | -0.00023 |
| C | 0.97553  | 0.79808  | -0.00015 |
| C | 0.63448  | -0.58072 | 0.00011  |
| C | 1.67354  | -1.54744 | 0.0003   |
| C | 2.9863   | -1.15883 | 0.00022  |
| H | 0.19393  | 2.81473  | -0.00054 |
| H | 4.37014  | 0.50719  | -0.00012 |
| H | 2.59865  | 2.22395  | -0.00044 |
| C | -0.0661  | 1.76187  | -0.00034 |
| C | -0.73341 | -0.95812 | 0.00019  |

|    |          |          |          |
|----|----------|----------|----------|
| H  | 1.40871  | -2.59912 | 0.00051  |
| H  | 3.77373  | -1.90295 | 0.00037  |
| C  | -1.70121 | 0.00592  | 0.00001  |
| C  | -1.38015 | 1.38222  | -0.00027 |
| H  | -2.17836 | 2.11304  | -0.00042 |
| H  | -1.00387 | -2.0076  | 0.00041  |
| Cl | -3.38384 | -0.45148 | 0.00008  |

No. 7

|   |          |          |          |
|---|----------|----------|----------|
| C | 2.89744  | 1.92988  | 0.00007  |
| C | 1.59235  | 2.31029  | 0.00002  |
| C | 0.54676  | 1.33516  | -0.00002 |
| C | 0.88171  | -0.06224 | -0.00002 |
| C | 2.27626  | -0.40005 | 0.       |
| C | 3.24944  | 0.54899  | 0.00006  |
| C | -0.79676 | 1.71078  | -0.00005 |
| C | -0.14133 | -1.00898 | -0.00001 |
| C | -1.48364 | -0.62625 | 0.       |
| C | -1.82181 | 0.76569  | -0.00005 |
| C | -3.20252 | 1.13949  | -0.00006 |
| H | -3.45295 | 2.19495  | -0.00012 |
| C | -4.17943 | 0.19161  | 0.       |
| C | -3.84294 | -1.19574 | 0.00007  |
| C | -2.54037 | -1.59016 | 0.00007  |
| H | -1.04717 | 2.76734  | -0.00009 |
| H | 3.68827  | 2.66988  | 0.00013  |
| H | 1.31993  | 3.35983  | 0.       |
| H | 4.29029  | 0.25155  | 0.00012  |
| H | 0.10479  | -2.06396 | -0.00001 |
| H | -5.2228  | 0.48444  | 0.00001  |
| H | -4.63648 | -1.93339 | 0.00013  |

|    |         |          |          |
|----|---------|----------|----------|
| H  | -2.2793 | -2.64294 | 0.00012  |
| Cl | 2.74262 | -2.08109 | -0.00005 |

No. 8

|    |          |          |          |
|----|----------|----------|----------|
| C  | 2.74023  | 1.32376  | 0.       |
| C  | 1.48365  | 1.84374  | 0.00001  |
| C  | 0.33087  | 0.99671  | 0.00001  |
| C  | 0.52277  | -0.42401 | -0.00001 |
| C  | 1.85488  | -0.94386 | -0.00002 |
| C  | 2.91141  | -0.09124 | 0.       |
| C  | -0.96495 | 1.51093  | 0.       |
| C  | -0.59133 | -1.26353 | -0.00002 |
| C  | -1.88833 | -0.74875 | 0.       |
| C  | -2.08053 | 0.67218  | -0.00001 |
| C  | -3.41532 | 1.18585  | -0.00001 |
| H  | -3.55571 | 2.26139  | -0.00003 |
| C  | -4.48574 | 0.34508  | 0.       |
| C  | -4.29471 | -1.06919 | 0.00001  |
| C  | -3.04003 | -1.59724 | 0.00001  |
| H  | -1.10974 | 2.58704  | 0.       |
| H  | 3.61576  | 1.96032  | -0.00001 |
| H  | 1.3389   | 2.91852  | 0.00002  |
| H  | -0.44624 | -2.33941 | -0.00002 |
| H  | -5.49293 | 0.74422  | 0.00003  |
| H  | -5.16005 | -1.72136 | 0.00001  |
| H  | -2.8905  | -2.67153 | 0.00002  |
| H  | 2.01139  | -2.01575 | -0.00002 |
| Cl | 4.54069  | -0.71565 | 0.00001  |

No. 9

|   |          |          |          |
|---|----------|----------|----------|
| C | -3.64363 | -1.19892 | -0.00001 |
|---|----------|----------|----------|

|    |          |          |          |
|----|----------|----------|----------|
| C  | -2.45945 | -1.86778 | 0.00003  |
| C  | -1.21473 | -1.16382 | 0.00003  |
| C  | -1.22995 | 0.27181  | 0.00001  |
| C  | -2.49632 | 0.93723  | -0.00003 |
| C  | -3.6575  | 0.22598  | -0.00004 |
| C  | -0.00001 | -1.84469 | 0.00003  |
| C  | 0.00003  | 0.9423   | 0.00001  |
| C  | 1.22986  | 0.27175  | 0.00002  |
| C  | 1.21464  | -1.16387 | 0.       |
| C  | 2.45945  | -1.86786 | -0.00002 |
| H  | 2.43333  | -2.95206 | -0.00005 |
| C  | 3.64357  | -1.19904 | -0.00003 |
| C  | 3.65747  | 0.22595  | -0.00001 |
| C  | 2.4963   | 0.93721  | 0.00001  |
| H  | -0.00003 | -2.93    | 0.00003  |
| H  | -4.58014 | -1.7434  | -0.00002 |
| H  | -2.43337 | -2.95198 | 0.00006  |
| H  | 4.58013  | -1.74344 | -0.00004 |
| H  | 4.60665  | 0.74841  | -0.00002 |
| H  | 2.51976  | 2.01831  | 0.00003  |
| H  | -2.51961 | 2.01832  | -0.00003 |
| H  | -4.60671 | 0.74833  | -0.00008 |
| Cl | 0.0001   | 2.69118  | 0.00001  |

No. 10

|   |          |          |          |
|---|----------|----------|----------|
| C | -3.81676 | -0.55532 | 0.00002  |
| C | -2.73121 | -1.3983  | 0.00009  |
| C | -1.41822 | -0.88312 | 0.00006  |
| C | -1.20625 | 0.51354  | -0.00001 |
| C | -2.33923 | 1.35433  | -0.00012 |
| C | -3.61454 | 0.83417  | -0.0001  |

|    |          |          |          |
|----|----------|----------|----------|
| C  | -0.29809 | -1.77742 | 0.00008  |
| C  | 0.16011  | 1.01938  | 0.00001  |
| C  | 1.25198  | 0.11362  | -0.00003 |
| C  | 0.96354  | -1.29965 | 0.       |
| C  | 2.57165  | 0.60954  | -0.00004 |
| C  | 2.81583  | 1.96296  | 0.       |
| C  | 1.74331  | 2.86573  | 0.00007  |
| C  | 0.44814  | 2.40029  | 0.00008  |
| H  | -0.47651 | -2.84592 | 0.00013  |
| H  | -4.82245 | -0.95788 | 0.00005  |
| H  | -2.86887 | -2.47409 | 0.00016  |
| H  | -2.22004 | 2.42922  | -0.00025 |
| H  | -4.46687 | 1.50307  | -0.00019 |
| H  | 3.39677  | -0.08978 | -0.00008 |
| H  | 3.83529  | 2.32893  | -0.00001 |
| H  | 1.93203  | 3.93251  | 0.00014  |
| H  | -0.36031 | 3.11832  | 0.00017  |
| Cl | 2.28643  | -2.44135 | -0.00005 |

No. 11

|   |          |          |          |
|---|----------|----------|----------|
| C | -4.12081 | -0.40627 | -0.00001 |
| C | -3.13232 | -1.36106 | 0.00007  |
| C | -1.7703  | -0.99348 | 0.00006  |
| C | -1.41005 | 0.37348  | 0.       |
| C | -2.44586 | 1.33219  | -0.00012 |
| C | -3.7695  | 0.95378  | -0.00012 |
| C | -0.74521 | -1.99687 | 0.00009  |
| C | 0.00094  | 0.73782  | 0.00003  |
| C | 0.97758  | -0.29081 | 0.       |
| C | 0.56533  | -1.66664 | 0.00003  |
| C | 2.34136  | 0.08642  | -0.00002 |

|    |          |          |          |
|----|----------|----------|----------|
| C  | 2.73868  | 1.40071  | 0.00001  |
| C  | 1.76263  | 2.40617  | 0.00009  |
| C  | 0.42615  | 2.08206  | 0.00011  |
| H  | -1.04649 | -3.03901 | 0.00015  |
| H  | -5.16438 | -0.6978  | -0.00001 |
| H  | -3.38536 | -2.41603 | 0.00013  |
| H  | -2.21217 | 2.38826  | -0.00025 |
| H  | -4.5444  | 1.71115  | -0.00023 |
| H  | 1.32334  | -2.43791 | 0.00001  |
| H  | 3.79296  | 1.64548  | -0.00001 |
| H  | 2.07011  | 3.44495  | 0.00016  |
| H  | -0.30059 | 2.88209  | 0.00021  |
| Cl | 3.58561  | -1.14272 | -0.00008 |

No. 12

|   |          |          |          |
|---|----------|----------|----------|
| C | 4.31022  | -0.37401 | -0.00001 |
| C | 3.62165  | 0.81582  | 0.00002  |
| C | 2.21153  | 0.83718  | 0.00002  |
| C | 1.49048  | -0.38002 | -0.00001 |
| C | 2.22254  | -1.58607 | -0.00005 |
| C | 3.59965  | -1.5852  | -0.00005 |
| C | 1.50434  | 2.08733  | 0.00002  |
| C | 0.03537  | -0.33874 | 0.00001  |
| C | -0.61881 | 0.91523  | -0.00001 |
| C | 0.1537   | 2.12674  | -0.00001 |
| C | -2.02748 | 0.97738  | -0.00002 |
| C | -2.76194 | -0.18073 | 0.00001  |
| C | -2.13742 | -1.43502 | 0.00005  |
| C | -0.76299 | -1.50197 | 0.00006  |
| H | 2.0837   | 3.00434  | 0.00003  |
| H | 5.39341  | -0.37976 | 0.       |



|    |          |          |          |
|----|----------|----------|----------|
| H  | 4.15573  | 1.75997  | 0.00005  |
| H  | 1.70504  | -2.53609 | -0.00011 |
| H  | 4.13743  | -2.52575 | -0.0001  |
| H  | -0.3745  | 3.07371  | -0.00003 |
| H  | -2.7394  | -2.33458 | 0.00009  |
| H  | -0.30066 | -2.47993 | 0.00012  |
| H  | -2.52424 | 1.9401   | -0.00004 |
| Cl | -4.50479 | -0.10527 | -0.00001 |

No. 13

|   |          |          |          |
|---|----------|----------|----------|
| C | -3.91533 | -1.21677 | -0.00009 |
| C | -3.62219 | 0.12632  | -0.00023 |
| C | -2.28555 | 0.57682  | -0.00012 |
| C | -1.22903 | -0.36416 | 0.00006  |
| C | -1.55843 | -1.73631 | 0.00025  |
| C | -2.87007 | -2.15484 | 0.00018  |
| C | -1.9938  | 1.98357  | -0.00013 |
| C | 0.14466  | 0.11915  | 0.00006  |
| C | 0.38523  | 1.51334  | 0.00012  |
| C | -0.71881 | 2.43092  | 0.00005  |
| C | 1.71169  | 1.99143  | 0.00016  |
| C | 2.7825   | 1.13082  | 0.00011  |
| C | 2.53118  | -0.2482  | -0.00001 |
| C | 1.25316  | -0.75262 | -0.00003 |
| H | -2.82529 | 2.67979  | -0.00025 |
| H | -4.9453  | -1.55276 | -0.00017 |
| H | -4.4186  | 0.86278  | -0.00041 |
| H | -0.77597 | -2.48364 | 0.00053  |
| H | -3.09541 | -3.21464 | 0.00036  |
| H | -0.50404 | 3.49395  | 0.00011  |
| H | 1.12133  | -1.82522 | -0.00018 |

|    |         |          |          |
|----|---------|----------|----------|
| H  | 1.88063 | 3.06272  | 0.00023  |
| H  | 3.8017  | 1.49476  | 0.00014  |
| Cl | 3.88645 | -1.34791 | -0.00015 |

No. 14

|    |          |          |          |
|----|----------|----------|----------|
| C  | -3.68732 | -0.5265  | 0.03578  |
| C  | -3.16838 | 0.72966  | -0.16581 |
| C  | -1.7784  | 0.95859  | -0.12893 |
| C  | -0.87621 | -0.1213  | 0.06227  |
| C  | -1.44737 | -1.38829 | 0.32328  |
| C  | -2.81198 | -1.58491 | 0.30962  |
| C  | -1.29526 | 2.30627  | -0.21709 |
| C  | 0.56406  | 0.15616  | 0.04685  |
| C  | 0.98227  | 1.5184   | 0.05641  |
| C  | 0.0172   | 2.57461  | -0.07726 |
| C  | 2.34183  | 1.86961  | 0.14908  |
| C  | 3.31756  | 0.90522  | 0.19304  |
| C  | 2.94701  | -0.43735 | 0.08993  |
| C  | 1.61745  | -0.79612 | 0.00146  |
| H  | -2.017   | 3.10381  | -0.3549  |
| H  | -4.75768 | -0.69135 | 0.01086  |
| H  | -3.82494 | 1.57613  | -0.33587 |
| H  | -0.82121 | -2.22724 | 0.57075  |
| H  | -3.20567 | -2.57204 | 0.52082  |
| H  | 0.38323  | 3.59501  | -0.09282 |
| H  | 2.60252  | 2.92169  | 0.17261  |
| H  | 4.36441  | 1.1716   | 0.26865  |
| H  | 3.69877  | -1.21482 | 0.05167  |
| Cl | 1.36722  | -2.50866 | -0.28727 |

No. 15

|    |          |          |          |
|----|----------|----------|----------|
| C  | -3.80596 | 0.56723  | -0.00001 |
| C  | -2.58921 | 1.24117  | 0.00013  |
| C  | -1.41453 | 0.49607  | 0.00014  |
| C  | -1.45337 | -0.90565 | 0.       |
| C  | -2.66856 | -1.57317 | -0.00018 |
| C  | -3.8461  | -0.82734 | -0.00019 |
| C  | -0.05172 | -1.46996 | 0.00021  |
| C  | 0.79533  | -0.22484 | 0.00007  |
| C  | -0.00804 | 0.92556  | 0.0001   |
| C  | 0.55927  | 2.1946   | -0.00001 |
| H  | -0.06229 | 3.08242  | 0.00001  |
| C  | 1.94663  | 2.30474  | -0.00012 |
| C  | 2.75767  | 1.17169  | -0.00011 |
| C  | 2.17061  | -0.08951 | -0.00002 |
| H  | -4.73218 | 1.12945  | 0.00001  |
| H  | -2.56083 | 2.32499  | 0.00026  |
| H  | -2.70581 | -2.65701 | -0.0003  |
| H  | -4.80321 | -1.33526 | -0.00032 |
| H  | 2.41101  | 3.28349  | -0.00019 |
| H  | 3.83646  | 1.26032  | -0.0002  |
| H  | 0.14729  | -2.08871 | 0.88096  |
| H  | 0.14755  | -2.08947 | -0.87992 |
| Cl | 3.1747   | -1.5161  | -0.00002 |

No. 16

|   |          |          |          |
|---|----------|----------|----------|
| C | -3.85838 | 1.10052  | -0.00042 |
| C | -2.5134  | 1.45699  | -0.00036 |
| C | -1.55536 | 0.44855  | 0.00001  |
| C | -1.93618 | -0.90062 | 0.0001   |
| C | -3.27768 | -1.25175 | 0.00014  |
| C | -4.23819 | -0.24186 | -0.00012 |

|    |          |          |          |
|----|----------|----------|----------|
| C  | -0.71364 | -1.79034 | 0.00032  |
| C  | 0.41935  | -0.79026 | 0.       |
| C  | -0.08714 | 0.51686  | 0.0003   |
| C  | 0.776    | 1.60711  | 0.00053  |
| H  | 0.39394  | 2.62162  | 0.00081  |
| C  | 2.14871  | 1.38465  | 0.0004   |
| C  | 2.63367  | 0.07983  | -0.00004 |
| C  | 1.78569  | -1.02285 | -0.00023 |
| H  | -4.61944 | 1.87198  | -0.0006  |
| H  | -2.22139 | 2.50147  | -0.00052 |
| H  | -3.57881 | -2.29403 | 0.00021  |
| H  | -5.29074 | -0.50028 | -0.00021 |
| H  | 2.84664  | 2.21207  | 0.00055  |
| H  | -0.68204 | -2.4361  | 0.88293  |
| H  | -0.68196 | -2.4372  | -0.88146 |
| H  | 2.1957   | -2.0256  | -0.00053 |
| Cl | 4.36102  | -0.18205 | -0.00029 |

No. 17

|   |          |          |          |
|---|----------|----------|----------|
| C | 3.30045  | -1.74921 | 0.00019  |
| C | 1.91168  | -1.67263 | 0.0005   |
| C | 1.31403  | -0.41684 | 0.00013  |
| C | 2.0922   | 0.74988  | -0.0002  |
| C | 3.47633  | 0.66844  | -0.00052 |
| C | 4.07643  | -0.58946 | -0.00035 |
| C | 1.20236  | 1.9722   | 0.00015  |
| C | -0.18378 | 1.37118  | 0.00023  |
| C | -0.10323 | -0.02856 | 0.00022  |
| C | -1.25086 | -0.81376 | 0.       |
| H | -1.20634 | -1.89585 | 0.       |
| C | -2.4771  | -0.16335 | -0.00013 |

|    |          |          |          |
|----|----------|----------|----------|
| C  | -2.57839 | 1.2248   | 0.00002  |
| C  | -1.41949 | 1.9985   | 0.00024  |
| H  | 3.78603  | -2.71778 | 0.00031  |
| H  | 1.31072  | -2.57525 | 0.0008   |
| H  | 4.08521  | 1.56613  | -0.00086 |
| H  | 5.15704  | -0.66921 | -0.00057 |
| H  | 1.37378  | 2.59631  | 0.88263  |
| H  | 1.3737   | 2.5971   | -0.88177 |
| H  | -1.49604 | 3.08016  | 0.00025  |
| H  | -3.55661 | 1.68791  | -0.00006 |
| Cl | -3.94066 | -1.11628 | -0.00021 |

No. 18

|   |          |          |          |
|---|----------|----------|----------|
| C | -2.99009 | 1.37976  | -0.0004  |
| C | -1.59828 | 1.39581  | -0.00047 |
| C | -0.91273 | 0.18171  | -0.00017 |
| C | -1.62632 | -1.02839 | 0.00012  |
| C | -3.01208 | -1.0372  | 0.00022  |
| C | -3.69395 | 0.1775   | -0.00004 |
| C | -0.6807  | -2.20287 | 0.00046  |
| C | 0.67429  | -1.53896 | -0.00003 |
| C | 0.52673  | -0.13978 | 0.00009  |
| C | 1.67693  | 0.64397  | 0.00009  |
| C | 2.93629  | 0.05513  | -0.00015 |
| C | 3.05701  | -1.33003 | -0.00038 |
| C | 1.92219  | -2.13824 | -0.0003  |
| H | -3.53296 | 2.3175   | -0.00059 |
| H | -1.06723 | 2.33652  | -0.00074 |
| H | -3.55831 | -1.97425 | 0.00043  |
| H | -4.77747 | 0.18814  | -0.00003 |
| H | -0.81756 | -2.83423 | 0.88371  |

|    |          |          |          |
|----|----------|----------|----------|
| H  | -0.81801 | -2.83558 | -0.88173 |
| H  | 2.01581  | -3.21827 | -0.00043 |
| H  | 4.04439  | -1.77534 | -0.00063 |
| H  | 3.81487  | 0.68768  | -0.00019 |
| Cl | 1.58945  | 2.38808  | 0.00035  |

No. 19

|    |          |          |          |
|----|----------|----------|----------|
| C  | 3.01531  | -1.2118  | 0.       |
| C  | 1.65659  | -1.5199  | 0.00001  |
| C  | 0.73417  | -0.47597 | 0.00001  |
| C  | 1.16486  | 0.86424  | 0.       |
| C  | 2.51937  | 1.1634   | -0.00001 |
| C  | 3.44428  | 0.11713  | -0.00001 |
| C  | -0.02882 | 1.79694  | 0.00001  |
| C  | -1.20617 | 0.84236  | 0.00001  |
| C  | -0.73026 | -0.49253 | 0.       |
| C  | -1.67586 | -1.49022 | 0.       |
| C  | -3.03418 | -1.28077 | -0.00001 |
| C  | -3.48114 | 0.05091  | -0.00001 |
| C  | -2.56838 | 1.10822  | 0.       |
| H  | 3.74841  | -2.01188 | 0.       |
| H  | 1.3205   | -2.55128 | 0.00002  |
| H  | 2.86062  | 2.19429  | -0.00002 |
| H  | 4.50648  | 0.33882  | -0.00002 |
| H  | -0.0343  | 2.40435  | -0.88085 |
| H  | -2.92816 | 2.13251  | -0.00001 |
| H  | -4.54736 | 0.25584  | -0.00002 |
| H  | -3.74485 | -2.10054 | -0.00001 |
| H  | -1.32954 | -2.50262 | 0.00001  |
| Cl | -0.03782 | 2.79601  | 1.44894  |

## No. 20

|    |          |          |          |
|----|----------|----------|----------|
| C  | -1.01079 | -1.70621 | 0.00003  |
| C  | 0.43438  | -1.42094 | 0.00006  |
| C  | 0.56275  | -0.01259 | -0.00005 |
| C  | -0.70721 | 0.59838  | -0.00004 |
| C  | -1.66367 | -0.52049 | -0.00015 |
| C  | 1.76598  | 0.67956  | -0.00006 |
| C  | -0.78655 | 1.96666  | 0.00006  |
| C  | 0.42914  | 2.70706  | 0.00009  |
| C  | 1.66651  | 2.09935  | 0.00001  |
| C  | 1.58467  | -2.16985 | 0.00012  |
| C  | 2.83968  | -1.49387 | -0.00001 |
| C  | 2.94463  | -0.12118 | -0.00011 |
| H  | 3.74422  | -2.09077 | 0.       |
| H  | 3.92104  | 0.35079  | -0.0001  |
| H  | 2.56714  | 2.70394  | 0.00001  |
| H  | -1.47189 | -2.68273 | 0.00008  |
| H  | -1.73983 | 2.48325  | 0.00007  |
| H  | 0.37357  | 3.78912  | 0.00013  |
| H  | 1.56282  | -3.25377 | 0.00019  |
| Cl | -3.37143 | -0.29029 | 0.       |

## No. 21

|   |          |          |          |
|---|----------|----------|----------|
| C | -0.57398 | 2.06472  | 0.00007  |
| C | -0.68101 | 0.59779  | -0.00002 |
| C | 0.64223  | 0.1005   | 0.00004  |
| C | 1.55642  | 1.17756  | -0.00001 |
| C | 0.73849  | 2.40449  | 0.00001  |
| C | 0.99675  | -1.24156 | 0.00004  |
| C | 2.89819  | 0.88239  | -0.00001 |
| C | 3.29899  | -0.48395 | -0.00005 |

|    |          |          |          |
|----|----------|----------|----------|
| C  | 2.39181  | -1.52083 | -0.00001 |
| C  | -1.68735 | -0.33142 | -0.00008 |
| C  | -1.38081 | -1.72092 | 0.       |
| C  | -0.0812  | -2.17116 | 0.00007  |
| H  | -2.20376 | -2.42441 | -0.00001 |
| H  | 0.11674  | -3.23735 | 0.00004  |
| H  | 2.73882  | -2.54834 | -0.00002 |
| H  | -1.41556 | 2.74211  | 0.00018  |
| H  | 3.65423  | 1.65987  | -0.00003 |
| H  | 4.35865  | -0.7105  | -0.00006 |
| H  | 1.13137  | 3.41149  | -0.00012 |
| Cl | -3.35833 | 0.15067  | -0.00002 |

No. 22

|   |          |          |          |
|---|----------|----------|----------|
| C | 0.9813   | 2.46799  | 0.00004  |
| C | 0.01598  | 1.35133  | 0.       |
| C | 0.78891  | 0.16881  | -0.00001 |
| C | 2.16385  | 0.48636  | 0.       |
| C | 2.23759  | 1.96123  | -0.00005 |
| C | 0.26883  | -1.11765 | -0.00001 |
| C | 3.06522  | -0.54896 | 0.00001  |
| C | 2.56803  | -1.88423 | 0.00002  |
| C | 1.22212  | -2.17586 | 0.00001  |
| C | -1.35052 | 1.23608  | 0.00001  |
| C | -1.90239 | -0.07568 | -0.00001 |
| C | -1.14969 | -1.22575 | -0.00002 |
| H | -1.63787 | -2.19274 | -0.00002 |
| H | 0.8876   | -3.20737 | 0.00001  |
| H | 0.71671  | 3.51605  | 0.00007  |
| H | 4.1359   | -0.37816 | 0.00001  |
| H | 3.28169  | -2.6997  | 0.00002  |



|    |          |          |          |
|----|----------|----------|----------|
| H  | 3.15312  | 2.53619  | -0.00006 |
| H  | -2.01685 | 2.09018  | 0.00002  |
| Cl | -3.64563 | -0.20744 | 0.       |

No. 23

|    |          |          |          |
|----|----------|----------|----------|
| C  | 2.45174  | 1.69272  | 0.00001  |
| C  | 0.98796  | 1.51171  | -0.00003 |
| C  | 0.7683   | 0.11706  | 0.00004  |
| C  | 2.00387  | -0.56899 | 0.00004  |
| C  | 3.04657  | 0.47551  | 0.00005  |
| C  | -0.47546 | -0.50399 | 0.00002  |
| C  | 1.9829   | -1.94126 | -0.00003 |
| C  | 0.72311  | -2.60474 | -0.00004 |
| C  | -0.47481 | -1.9259  | -0.00001 |
| C  | -0.1098  | 2.33609  | -0.00006 |
| C  | -1.40608 | 1.75244  | -0.00001 |
| C  | -1.58461 | 0.38828  | 0.00003  |
| H  | -1.41273 | -2.46759 | -0.00004 |
| H  | 2.95759  | 2.64796  | -0.00001 |
| H  | 2.89471  | -2.52821 | -0.00003 |
| H  | 0.71072  | -3.68818 | -0.00009 |
| H  | 4.11099  | 0.28734  | 0.00003  |
| H  | -0.02009 | 3.41651  | -0.00012 |
| H  | -2.27988 | 2.39183  | 0.00001  |
| Cl | -3.20256 | -0.26078 | 0.00002  |

No. 24

|   |         |          |         |
|---|---------|----------|---------|
| C | 3.10184 | -0.26323 | 0.00004 |
| C | 1.91715 | 0.68527  | 0.00001 |
| C | 0.72747 | -0.07271 | 0.00001 |
| C | 0.97175 | -1.4612  | 0.00001 |

|    |          |          |          |
|----|----------|----------|----------|
| C  | 2.4702   | -1.69717 | 0.       |
| C  | -0.56065 | 0.50853  | 0.       |
| C  | -0.09968 | -2.31957 | 0.       |
| C  | -1.41218 | -1.78176 | -0.00001 |
| C  | -1.63517 | -0.42192 | -0.00001 |
| C  | 1.83222  | 2.05573  | 0.       |
| C  | 0.54823  | 2.66068  | -0.00001 |
| C  | -0.61865 | 1.92484  | -0.00001 |
| H  | 0.48574  | 3.74442  | -0.00002 |
| H  | -1.58106 | 2.42202  | -0.00002 |
| H  | 3.73965  | -0.10643 | 0.8766   |
| H  | 3.73973  | -0.10641 | -0.87646 |
| H  | 2.76278  | -2.23297 | 0.87876  |
| H  | 2.71899  | 2.68172  | 0.       |
| H  | 0.02679  | -3.39736 | 0.       |
| H  | -2.26353 | -2.45238 | -0.00001 |
| H  | -2.64129 | -0.05774 | -0.00002 |
| Cl | 2.95146  | -2.57841 | -1.44547 |

No. 25

|   |          |          |          |
|---|----------|----------|----------|
| C | 0.82441  | 2.43591  | 0.00004  |
| C | 1.5751   | 1.11817  | 0.00002  |
| C | 0.64123  | 0.06263  | 0.00014  |
| C | -0.68726 | 0.5331   | 0.0001   |
| C | -0.6874  | 2.04248  | 0.00017  |
| C | 0.995    | -1.29463 | 0.00009  |
| C | -1.68599 | -0.39737 | -0.00003 |
| C | -1.37927 | -1.78385 | 0.00001  |
| C | -0.0785  | -2.22555 | 0.00009  |
| C | 2.91072  | 0.81061  | -0.00014 |
| C | 3.29964  | -0.55687 | -0.00011 |
| C | 2.38413  | -1.58415 | 0.00002  |

|    |          |          |          |
|----|----------|----------|----------|
| H  | 4.35751  | -0.7938  | -0.00022 |
| H  | 2.71927  | -2.61541 | -0.00001 |
| H  | 0.12834  | -3.28981 | 0.00006  |
| H  | -2.19934 | -2.49118 | -0.00005 |
| H  | 1.07992  | 3.03191  | -0.87863 |
| H  | 1.08059  | 3.0322   | 0.87832  |
| H  | -1.21053 | 2.43002  | 0.87746  |
| H  | -1.21014 | 2.43018  | -0.87728 |
| H  | 3.67134  | 1.58334  | -0.00026 |
| Cl | -3.35811 | 0.10116  | -0.0001  |

No. 26

|   |          |          |          |
|---|----------|----------|----------|
| C | -2.38687 | 1.84989  | 0.       |
| C | -2.15196 | 0.35233  | -0.00001 |
| C | -0.76477 | 0.11055  | -0.00019 |
| C | -0.00995 | 1.30073  | -0.0001  |
| C | -0.95899 | 2.48225  | -0.00014 |
| C | -0.19423 | -1.17109 | -0.00017 |
| C | 1.35675  | 1.22288  | 0.00008  |
| C | 1.94402  | -0.07008 | -0.00003 |
| C | 1.22379  | -1.23829 | -0.00018 |
| C | -3.00631 | -0.71961 | 0.0002   |
| C | -2.4559  | -2.02996 | 0.00011  |
| C | -1.09957 | -2.26404 | -0.00009 |
| H | -3.13398 | -2.87585 | 0.00025  |
| H | -0.71932 | -3.27921 | -0.00008 |
| H | 1.73527  | -2.19283 | -0.00017 |
| H | -2.95851 | 2.15594  | 0.87879  |
| H | -2.95949 | 2.15572  | -0.87824 |
| H | -0.79822 | 3.11078  | -0.87854 |
| H | -0.79878 | 3.11052  | 0.87855  |

|    |          |          |         |
|----|----------|----------|---------|
| H  | -4.08261 | -0.58997 | 0.00038 |
| H  | 1.996    | 2.09715  | 0.00019 |
| Cl | 3.6908   | -0.15563 | 0.00012 |

No. 27

|    |          |          |          |
|----|----------|----------|----------|
| C  | 3.09621  | -0.25521 | -0.00004 |
| C  | 1.91046  | 0.68903  | -0.00003 |
| C  | 0.72334  | -0.07137 | -0.00011 |
| C  | 0.97433  | -1.45802 | -0.00004 |
| C  | 2.4723   | -1.68608 | -0.00007 |
| C  | -0.55924 | 0.50177  | -0.00008 |
| C  | -0.091   | -2.31878 | 0.00011  |
| C  | -1.40619 | -1.78382 | 0.00006  |
| C  | -1.63134 | -0.42923 | -0.00005 |
| C  | 1.82066  | 2.05602  | 0.00009  |
| C  | 0.53303  | 2.6559   | 0.00006  |
| C  | -0.62829 | 1.91792  | -0.00004 |
| H  | 0.46528  | 3.73778  | 0.00014  |
| H  | -1.59283 | 2.40967  | -0.00002 |
| H  | 3.72421  | -0.09263 | 0.87854  |
| H  | 3.72454  | -0.09211 | -0.8783  |
| H  | 2.78049  | -2.25719 | -0.87849 |
| H  | 2.78066  | -2.25676 | 0.87856  |
| H  | 2.7049   | 2.68352  | 0.00018  |
| H  | 0.04122  | -3.39454 | 0.0002   |
| H  | -2.25735 | -2.4534  | 0.00014  |
| Cl | -3.27392 | 0.16511  | 0.       |

**Br-PAHs**

No. 1

|    |          |          |         |
|----|----------|----------|---------|
| C  | 2.86724  | 0.00001  | 0.      |
| C  | 2.16991  | 1.20344  | 0.      |
| C  | 0.77876  | 1.21184  | 0.      |
| C  | 0.10023  | -0.00003 | 0.      |
| C  | 0.77877  | -1.21184 | 0.      |
| C  | 2.16996  | -1.20341 | 0.      |
| H  | 3.95021  | 0.00005  | 0.00001 |
| H  | 2.70683  | 2.14447  | 0.      |
| H  | 0.22774  | 2.14337  | 0.00001 |
| H  | 0.22783  | -2.14342 | 0.      |
| H  | 2.70686  | -2.14446 | 0.      |
| Br | -1.80025 | 0.       | 0.      |

No. 2

|    |          |          |          |
|----|----------|----------|----------|
| C  | -2.86907 | -0.27453 | 0.       |
| C  | -2.18003 | 0.93193  | 0.       |
| C  | -0.78406 | 0.98278  | 0.00003  |
| C  | -0.11018 | -0.24029 | 0.00001  |
| C  | -0.77696 | -1.45849 | -0.00001 |
| C  | -2.16656 | -1.47356 | 0.       |
| H  | -3.95223 | -0.277   | 0.00001  |
| H  | -2.73153 | 1.86583  | -0.00001 |
| H  | -0.21113 | -2.38118 | -0.00003 |
| H  | -2.69264 | -2.42035 | -0.00001 |
| C  | -0.05722 | 2.29799  | -0.00001 |
| H  | 0.58642  | 2.38538  | 0.87832  |
| H  | 0.58641  | 2.38531  | -0.87837 |
| H  | -0.76461 | 3.12683  | -0.00003 |
| Br | 1.79554  | -0.26514 | 0.       |

No. 3

|    |          |          |          |
|----|----------|----------|----------|
| C  | 1.46316  | 1.87578  | 0.0023   |
| C  | 2.43048  | 0.87784  | -0.00867 |
| C  | 2.0669   | -0.46907 | -0.01164 |
| C  | 0.71074  | -0.79788 | -0.00984 |
| C  | -0.24418 | 0.20936  | 0.00112  |
| C  | 0.11088  | 1.55102  | 0.00786  |
| H  | 1.75978  | 2.91793  | 0.00291  |
| H  | 3.48139  | 1.14564  | -0.01682 |
| H  | -0.65043 | 2.31969  | 0.01326  |
| C  | 3.11201  | -1.55422 | 0.00969  |
| H  | 3.3665   | -1.82017 | 1.03922  |
| H  | 2.75462  | -2.45628 | -0.48859 |
| H  | 4.02697  | -1.22673 | -0.48568 |
| H  | 0.40062  | -1.8361  | -0.01845 |
| Br | -2.08684 | -0.26289 | 0.00026  |

No. 4

|   |          |          |          |
|---|----------|----------|----------|
| C | 0.34154  | 1.20896  | -0.00374 |
| C | 1.73249  | 1.19799  | -0.00931 |
| C | 2.44904  | 0.00188  | -0.00937 |
| C | 1.73283  | -1.19568 | -0.00936 |
| C | 0.34298  | -1.20779 | -0.00376 |
| C | -0.34054 | 0.00076  | -0.0002  |
| H | -0.20525 | 2.14307  | -0.00573 |
| H | 2.26782  | 2.14153  | -0.01569 |
| C | 3.95536  | -0.00158 | 0.01402  |
| H | 4.32514  | -0.11347 | 1.03693  |
| H | 4.35583  | -0.82825 | -0.57505 |
| H | 4.35773  | 0.93024  | -0.38553 |
| H | 2.26943  | -2.1387  | -0.01569 |
| H | -0.20344 | -2.14212 | -0.00574 |

|    |          |          |         |
|----|----------|----------|---------|
| Br | -2.24141 | -0.00056 | 0.00277 |
|----|----------|----------|---------|

No. 5

|    |          |          |          |
|----|----------|----------|----------|
| C  | 0.34154  | 1.20896  | -0.00374 |
| C  | 1.73249  | 1.19799  | -0.00931 |
| C  | 2.44904  | 0.00188  | -0.00937 |
| C  | 1.73283  | -1.19568 | -0.00936 |
| C  | 0.34298  | -1.20779 | -0.00376 |
| C  | -0.34054 | 0.00076  | -0.0002  |
| H  | -0.20525 | 2.14307  | -0.00573 |
| H  | 2.26782  | 2.14153  | -0.01569 |
| C  | 3.95536  | -0.00158 | 0.01402  |
| H  | 4.32514  | -0.11347 | 1.03693  |
| H  | 4.35583  | -0.82825 | -0.57505 |
| H  | 4.35773  | 0.93024  | -0.38553 |
| H  | 2.26943  | -2.1387  | -0.01569 |
| H  | -0.20344 | -2.14212 | -0.00574 |
| Br | -2.24141 | -0.00056 | 0.00277  |

No. 6

|   |          |          |          |
|---|----------|----------|----------|
| C | 3.98593  | 0.09687  | -0.00006 |
| C | 3.05619  | 1.10228  | -0.00024 |
| C | 1.66927  | 0.80485  | -0.00017 |
| C | 1.25576  | -0.55366 | 0.00009  |
| C | 2.2412   | -1.57484 | 0.00028  |
| C | 3.573    | -1.25696 | 0.00021  |
| H | 0.99642  | 2.86023  | -0.00057 |
| H | 5.04341  | 0.33269  | -0.00012 |
| H | 3.36752  | 2.14147  | -0.00045 |
| C | 0.68046  | 1.82249  | -0.00036 |
| C | -0.13071 | -0.85795 | 0.00017  |

|    |          |          |          |
|----|----------|----------|----------|
| H  | 1.91982  | -2.6108  | 0.00049  |
| H  | 4.31823  | -2.04349 | 0.00036  |
| C  | -1.04588 | 0.15635  | -0.00002 |
| C  | -0.65264 | 1.51446  | -0.00029 |
| H  | -1.4064  | 2.29108  | -0.00044 |
| H  | -0.45257 | -1.89249 | 0.00037  |
| Br | -2.90234 | -0.24577 | 0.00008  |

No. 7

|   |          |          |          |
|---|----------|----------|----------|
| C | 2.01287  | 2.69867  | 0.0001   |
| C | 0.659    | 2.81906  | -0.0001  |
| C | -0.17796 | 1.66018  | -0.00014 |
| C | 0.41952  | 0.35174  | -0.0001  |
| C | 1.85391  | 0.29118  | 0.00005  |
| C | 2.62447  | 1.41146  | 0.00021  |
| C | -1.56814 | 1.77417  | -0.00013 |
| C | -0.40844 | -0.77011 | -0.00014 |
| C | -1.79892 | -0.64915 | -0.00011 |
| C | -2.39616 | 0.65237  | -0.00006 |
| C | -3.8224  | 0.7574   | 0.00012  |
| H | -4.26835 | 1.74607  | 0.0002   |
| C | -4.6012  | -0.35873 | 0.0002   |
| C | -4.00685 | -1.65667 | 0.00008  |
| C | -2.65289 | -1.79657 | -0.00009 |
| H | -2.01331 | 2.76442  | -0.00017 |
| H | 2.6459   | 3.57764  | 0.00015  |
| H | 0.18803  | 3.79561  | -0.00028 |
| H | 3.7034   | 1.32704  | 0.00042  |
| H | 0.03121  | -1.75994 | -0.00022 |
| H | -5.68106 | -0.26989 | 0.00035  |
| H | -4.64511 | -2.53229 | 0.0001   |



|    |          |          |          |
|----|----------|----------|----------|
| H  | -2.19672 | -2.78049 | -0.00021 |
| Br | 2.72615  | -1.39937 | 0.00001  |

No. 8

|    |          |          |          |
|----|----------|----------|----------|
| C  | 1.98501  | 1.54377  | 0.00001  |
| C  | 0.703    | 1.99744  | 0.00003  |
| C  | -0.40462 | 1.09273  | 0.00002  |
| C  | -0.13928 | -0.31633 | 0.00001  |
| C  | 1.21852  | -0.76745 | -0.00001 |
| C  | 2.22981  | 0.13892  | 0.00001  |
| C  | -1.72499 | 1.53995  | 0.00001  |
| C  | -1.20858 | -1.21197 | 0.00001  |
| C  | -2.53038 | -0.76429 | 0.00001  |
| C  | -2.79583 | 0.64526  | -0.00001 |
| C  | -4.15522 | 1.0897   | -0.00004 |
| H  | -4.3499  | 2.15675  | -0.00008 |
| C  | -5.18093 | 0.1949   | -0.00003 |
| C  | -4.91714 | -1.20788 | 0.       |
| C  | -3.63709 | -1.67059 | 0.00002  |
| H  | -1.92385 | 2.60735  | 0.       |
| H  | 2.8234   | 2.22769  | 0.00001  |
| H  | 0.50395  | 3.06354  | 0.00005  |
| H  | -1.00929 | -2.27914 | 0.00001  |
| H  | -6.20718 | 0.54242  | -0.00003 |
| H  | -5.74807 | -1.9031  | 0.00001  |
| H  | -3.43321 | -2.73588 | 0.00006  |
| H  | 1.42385  | -1.83118 | -0.00002 |
| Br | 4.03619  | -0.44781 | -0.00001 |

No. 9

|   |          |          |    |
|---|----------|----------|----|
| C | -3.64383 | -1.63024 | 0. |
|---|----------|----------|----|

|    |          |          |          |
|----|----------|----------|----------|
| C  | -2.45597 | -2.29171 | -0.00002 |
| C  | -1.21496 | -1.58114 | 0.       |
| C  | -1.23165 | -0.14419 | 0.00003  |
| C  | -2.5043  | 0.51066  | 0.00006  |
| C  | -3.66218 | -0.20591 | 0.00005  |
| C  | -0.0006  | -2.26119 | -0.00004 |
| C  | 0.00006  | 0.52654  | 0.00001  |
| C  | 1.23126  | -0.14482 | 0.00002  |
| C  | 1.21398  | -1.58173 | -0.00002 |
| C  | 2.45482  | -2.29281 | -0.00004 |
| H  | 2.42118  | -3.37684 | -0.00009 |
| C  | 3.64285  | -1.63183 | 0.       |
| C  | 3.66179  | -0.2074  | 0.00006  |
| C  | 2.50418  | 0.50961  | 0.00007  |
| H  | -0.00086 | -3.34655 | -0.00008 |
| H  | -4.57776 | -2.17906 | -0.00003 |
| H  | -2.42279 | -3.37576 | -0.00004 |
| H  | 4.57662  | -2.18093 | 0.00001  |
| H  | 4.61272  | 0.31196  | 0.00011  |
| H  | 2.53797  | 1.59008  | 0.00013  |
| H  | -2.53755 | 1.59109  | 0.00013  |
| H  | -4.61294 | 0.31367  | 0.00009  |
| Br | 0.00088  | 2.43455  | -0.00004 |

No. 10

|   |          |          |          |
|---|----------|----------|----------|
| C | -3.79663 | -1.72816 | 0.00002  |
| C | -2.47455 | -2.10357 | 0.00006  |
| C | -1.44958 | -1.13453 | 0.00004  |
| C | -1.77537 | 0.2396   | -0.00001 |
| C | -3.14056 | 0.59563  | -0.00008 |
| C | -4.12863 | -0.36357 | -0.00007 |

|    |          |          |          |
|----|----------|----------|----------|
| C  | -0.07516 | -1.5441  | 0.00005  |
| C  | -0.69786 | 1.21968  | 0.00001  |
| C  | 0.65544  | 0.79083  | -0.00001 |
| C  | 0.91697  | -0.62867 | 0.00001  |
| C  | 1.68781  | 1.75108  | -0.00002 |
| C  | 1.40365  | 3.09653  | 0.       |
| C  | 0.07002  | 3.52796  | 0.00004  |
| C  | -0.9524  | 2.60705  | 0.00005  |
| H  | 0.15264  | -2.60328 | 0.0001   |
| H  | -4.57912 | -2.47734 | 0.00003  |
| H  | -2.19994 | -3.15296 | 0.0001   |
| H  | -3.43289 | 1.63706  | -0.00017 |
| H  | -5.16922 | -0.06106 | -0.00012 |
| H  | 2.71608  | 1.416    | -0.00004 |
| H  | 2.21078  | 3.81888  | -0.00001 |
| H  | -0.15784 | 4.5871   | 0.00008  |
| H  | -1.97201 | 2.96682  | 0.00011  |
| Br | 2.7135   | -1.25959 | -0.00002 |

No. 11

|   |          |          |          |
|---|----------|----------|----------|
| C | -4.6106  | -0.72793 | -0.00001 |
| C | -3.52412 | -1.56928 | 0.00009  |
| C | -2.21058 | -1.05511 | 0.00008  |
| C | -1.99947 | 0.34224  | -0.00002 |
| C | -3.13395 | 1.18274  | -0.00017 |
| C | -4.40857 | 0.66193  | -0.00015 |
| C | -1.08355 | -1.94131 | 0.00012  |
| C | -0.63493 | 0.85664  | 0.00002  |
| C | 0.44965  | -0.06048 | 0.       |
| C | 0.18373  | -1.47242 | 0.00004  |
| C | 1.76314  | 0.46704  | -0.00001 |

|    |          |          |          |
|----|----------|----------|----------|
| C  | 2.01188  | 1.81828  | 0.00004  |
| C  | 0.93122  | 2.71008  | 0.00012  |
| C  | -0.36054 | 2.23949  | 0.00012  |
| H  | -1.2702  | -3.0098  | 0.00019  |
| H  | -5.61639 | -1.13033 | 0.00002  |
| H  | -3.66069 | -2.64536 | 0.00016  |
| H  | -3.01748 | 2.25784  | -0.00034 |
| H  | -5.26102 | 1.33082  | -0.00026 |
| H  | 1.01882  | -2.15935 | 0.00002  |
| H  | 3.03033  | 2.18362  | 0.00004  |
| H  | 1.12233  | 3.77628  | 0.00002  |
| H  | -1.17194 | 2.95346  | 0.00023  |
| Br | 3.2739   | -0.69339 | -0.00006 |

No. 12

|   |          |          |          |
|---|----------|----------|----------|
| C | -4.98367 | -0.39312 | -0.00004 |
| C | -4.30289 | 0.80113  | -0.00015 |
| C | -2.89284 | 0.83162  | -0.00009 |
| C | -2.16405 | -0.38104 | 0.00002  |
| C | -2.88831 | -1.59191 | 0.00019  |
| C | -4.26529 | -1.59994 | 0.00016  |
| C | -2.19364 | 2.08627  | -0.00006 |
| C | -0.70955 | -0.33057 | -0.00001 |
| C | -0.06331 | 0.92738  | 0.00009  |
| C | -0.84318 | 2.13417  | 0.00009  |
| C | 1.3453   | 0.99879  | 0.00011  |
| C | 2.08873  | -0.15445 | -0.00001 |
| C | 1.47081  | -1.41292 | -0.00017 |
| C | 0.09667  | -1.48834 | -0.00018 |
| H | -2.77877 | 2.99963  | -0.00013 |
| H | -6.06682 | -0.40607 | -0.00009 |

|    |          |          |          |
|----|----------|----------|----------|
| H  | -4.84296 | 1.74187  | -0.00027 |
| H  | -2.36451 | -2.53848 | 0.00041  |
| H  | -4.79725 | -2.54381 | 0.00032  |
| H  | -0.32082 | 3.08437  | 0.00019  |
| H  | 2.07413  | -2.31148 | -0.00031 |
| H  | -0.35873 | -2.4696  | -0.00038 |
| H  | 1.83054  | 1.9675   | 0.00021  |
| Br | 3.98447  | -0.05961 | 0.00001  |

No. 13

|   |          |          |          |
|---|----------|----------|----------|
| C | -4.32151 | -1.58307 | -0.00004 |
| C | -4.20903 | -0.21296 | -0.00013 |
| C | -2.94409 | 0.41107  | -0.00008 |
| C | -1.77227 | -0.38188 | 0.00002  |
| C | -1.91639 | -1.78499 | 0.00015  |
| C | -3.16078 | -2.37432 | 0.00012  |
| C | -2.8402  | 1.84374  | -0.0001  |
| C | -0.47467 | 0.27891  | 0.00002  |
| C | -0.41935 | 1.69205  | 0.00007  |
| C | -1.63509 | 2.45603  | 0.00001  |
| C | 0.83328  | 2.33905  | 0.00011  |
| C | 2.00865  | 1.62665  | 0.0001   |
| C | 1.94017  | 0.22622  | 0.00001  |
| C | 0.73844  | -0.44049 | -0.00003 |
| H | -3.75607 | 2.4247   | -0.00019 |
| H | -5.29787 | -2.05237 | -0.00008 |
| H | -5.09628 | 0.41127  | -0.00022 |
| H | -1.04163 | -2.42191 | 0.00031  |
| H | -3.24376 | -3.45458 | 0.00024  |
| H | -1.5626  | 3.53807  | 0.00005  |
| H | 0.74271  | -1.52088 | -0.00015 |

|    |         |          |          |
|----|---------|----------|----------|
| H  | 0.86098 | 3.4233   | 0.00015  |
| H  | 2.96858 | 2.12602  | 0.00014  |
| Br | 3.55609 | -0.77285 | -0.00005 |

No. 14

|    |          |          |          |
|----|----------|----------|----------|
| C  | -3.57663 | -1.5065  | 0.07487  |
| C  | -3.53087 | -0.16593 | -0.22429 |
| C  | -2.31717 | 0.54876  | -0.17992 |
| C  | -1.10068 | -0.12163 | 0.11219  |
| C  | -1.19516 | -1.4817  | 0.48296  |
| C  | -2.39748 | -2.15571 | 0.46303  |
| C  | -2.33969 | 1.97322  | -0.34928 |
| C  | 0.14783  | 0.64621  | 0.09704  |
| C  | 0.05191  | 2.06715  | 0.04981  |
| C  | -1.21826 | 2.70011  | -0.17823 |
| C  | 1.19127  | 2.8838   | 0.17195  |
| C  | 2.4419   | 2.33258  | 0.29664  |
| C  | 2.58108  | 0.94353  | 0.22871  |
| C  | 1.47196  | 0.13036  | 0.10744  |
| H  | -3.2886  | 2.45271  | -0.56291 |
| H  | -4.51543 | -2.04622 | 0.0447   |
| H  | -4.43743 | 0.37416  | -0.47502 |
| H  | -0.3239  | -2.01284 | 0.82555  |
| H  | -2.42549 | -3.19682 | 0.76215  |
| H  | -1.2393  | 3.78217  | -0.24327 |
| H  | 1.05984  | 3.95972  | 0.1526   |
| H  | 3.32075  | 2.95724  | 0.39758  |
| H  | 3.56577  | 0.49547  | 0.23788  |
| Br | 1.91496  | -1.70089 | -0.23019 |

No. 15

|    |          |          |          |
|----|----------|----------|----------|
| C  | -4.37772 | 0.14379  | 0.00006  |
| C  | -3.2804  | 0.99892  | 0.00036  |
| C  | -2.00478 | 0.4449   | 0.00031  |
| C  | -1.82466 | -0.94556 | -0.00001 |
| C  | -2.92152 | -1.79424 | -0.00022 |
| C  | -4.20051 | -1.24004 | -0.00022 |
| C  | -0.35186 | -1.28325 | 0.0001   |
| C  | 0.2927   | 0.07833  | -0.00005 |
| C  | -0.68247 | 1.08826  | -0.0002  |
| C  | -0.32392 | 2.43086  | -0.00016 |
| H  | -1.07887 | 3.20847  | -0.00026 |
| C  | 1.0284   | 2.76022  | -0.0001  |
| C  | 2.00945  | 1.77079  | -0.00007 |
| C  | 1.62919  | 0.43192  | -0.00005 |
| H  | -5.3804  | 0.55445  | 0.00011  |
| H  | -3.42072 | 2.07404  | 0.00062  |
| H  | -2.79032 | -2.87083 | -0.00044 |
| H  | -5.06758 | -1.89006 | -0.0004  |
| H  | 1.33212  | 3.80037  | -0.00014 |
| H  | 3.05943  | 2.03407  | -0.00005 |
| H  | -0.05935 | -1.86438 | 0.88051  |
| H  | -0.05901 | -1.86497 | -0.87978 |
| Br | 2.95752  | -0.92831 | 0.00004  |

No. 16

|   |          |         |          |
|---|----------|---------|----------|
| C | -4.56085 | 1.0646  | -0.00014 |
| C | -3.22141 | 1.44065 | -0.00002 |
| C | -2.24916 | 0.44604 | 0.00011  |
| C | -2.60973 | -0.9092 | 0.00005  |
| C | -3.94572 | -1.2795 | -0.00009 |
| C | -4.92054 | -0.2832 | -0.00019 |

|    |          |          |          |
|----|----------|----------|----------|
| C  | -1.37342 | -1.77924 | 0.00024  |
| C  | -0.25551 | -0.7625  | 0.00007  |
| C  | -0.78268 | 0.53698  | 0.00007  |
| C  | 0.06264  | 1.64083  | 0.00015  |
| H  | -0.33474 | 2.64937  | 0.00016  |
| C  | 1.4392   | 1.44059  | 0.00014  |
| C  | 1.94455  | 0.14341  | 0.00001  |
| C  | 1.11421  | -0.97365 | -0.00005 |
| H  | -5.33305 | 1.82471  | -0.0002  |
| H  | -2.94508 | 2.48927  | 0.00003  |
| H  | -4.23199 | -2.3258  | -0.00015 |
| H  | -5.969   | -0.55724 | -0.00031 |
| H  | 2.11946  | 2.28223  | 0.00016  |
| H  | -1.33203 | -2.42488 | 0.88277  |
| H  | -1.33194 | -2.42567 | -0.88169 |
| H  | 1.53567  | -1.97163 | -0.00012 |
| Br | 3.82781  | -0.1113  | -0.00008 |

No. 17

|   |          |          |          |
|---|----------|----------|----------|
| C | 3.7453   | -1.94382 | 0.       |
| C | 2.37071  | -1.72979 | 0.00012  |
| C | 1.89999  | -0.42085 | 0.00008  |
| C | 2.79053  | 0.66223  | -0.00002 |
| C | 4.15994  | 0.44389  | -0.00018 |
| C | 4.63257  | -0.86728 | -0.00017 |
| C | 2.02789  | 1.96731  | 0.00017  |
| C | 0.58838  | 1.5078   | 0.00005  |
| C | 0.52834  | 0.10708  | 0.00013  |
| C | -0.69285 | -0.55814 | 0.0001   |
| H | -0.75311 | -1.63933 | 0.00016  |
| C | -1.84765 | 0.21345  | -0.00001 |



|    |          |          |          |
|----|----------|----------|----------|
| C  | -1.80935 | 1.60499  | -0.0001  |
| C  | -0.57755 | 2.25689  | -0.00006 |
| H  | 4.13172  | -2.95601 | 0.00001  |
| H  | 1.68438  | -2.5691  | 0.00021  |
| H  | 4.85435  | 1.27696  | -0.00029 |
| H  | 5.69994  | -1.05361 | -0.00029 |
| H  | 2.26034  | 2.57141  | 0.88256  |
| H  | 2.26056  | 2.5721   | -0.88167 |
| H  | -0.54399 | 3.34073  | -0.00014 |
| H  | -2.73282 | 2.1692   | -0.0002  |
| Br | -3.53597 | -0.66214 | -0.00003 |

No. 18

|   |          |          |          |
|---|----------|----------|----------|
| C | 2.76294  | -1.96257 | -0.00029 |
| C | 1.43688  | -1.54013 | -0.00036 |
| C | 1.16504  | -0.1714  | -0.00019 |
| C | 2.22579  | 0.74971  | 0.00004  |
| C | 3.54408  | 0.32283  | 0.00018  |
| C | 3.81024  | -1.04408 | 0.       |
| C | 1.70416  | 2.16256  | 0.00038  |
| C | 0.20932  | 1.96503  | -0.00002 |
| C | -0.10092 | 0.59085  | -0.00002 |
| C | -1.44533 | 0.22621  | 0.00002  |
| C | -2.44487 | 1.19382  | -0.00014 |
| C | -2.11057 | 2.54357  | -0.00027 |
| C | -0.77524 | 2.93743  | -0.00018 |
| H | 2.98148  | -3.02393 | -0.00045 |
| H | 0.63997  | -2.26931 | -0.0007  |
| H | 4.35626  | 1.04171  | 0.00032  |
| H | 4.83526  | -1.39572 | 0.00006  |
| H | 2.03426  | 2.71809  | 0.8835   |

|    |          |          |          |
|----|----------|----------|----------|
| H  | 2.03493  | 2.71915  | -0.8818  |
| H  | -0.5101  | 3.98877  | -0.00025 |
| H  | -2.90044 | 3.28479  | -0.00046 |
| H  | -3.48236 | 0.88544  | -0.00015 |
| Br | -1.99653 | -1.59406 | 0.00014  |

No. 19

|    |          |          |          |
|----|----------|----------|----------|
| C  | 3.01531  | -1.2118  | 0.       |
| C  | 1.65659  | -1.5199  | 0.00001  |
| C  | 0.73417  | -0.47597 | 0.00001  |
| C  | 1.16486  | 0.86424  | 0.       |
| C  | 2.51937  | 1.1634   | -0.00001 |
| C  | 3.44428  | 0.11713  | -0.00001 |
| C  | -0.02882 | 1.79694  | 0.00001  |
| C  | -1.20617 | 0.84236  | 0.00001  |
| C  | -0.73026 | -0.49253 | 0.       |
| C  | -1.67586 | -1.49022 | 0.       |
| C  | -3.03418 | -1.28077 | -0.00001 |
| C  | -3.48114 | 0.05091  | -0.00001 |
| C  | -2.56838 | 1.10822  | 0.       |
| H  | 3.74841  | -2.01188 | 0.       |
| H  | 1.3205   | -2.55128 | 0.00002  |
| H  | 2.86062  | 2.19429  | -0.00002 |
| H  | 4.50648  | 0.33882  | -0.00002 |
| H  | -0.0343  | 2.40435  | -0.88085 |
| H  | -2.92816 | 2.13251  | -0.00001 |
| H  | -4.54736 | 0.25584  | -0.00002 |
| H  | -3.74485 | -2.10054 | -0.00001 |
| H  | -1.32954 | -2.50262 | 0.00001  |
| Br | -0.03859 | 2.88116  | 1.57243  |

No. 20

|    |          |          |          |
|----|----------|----------|----------|
| C  | -0.49133 | -1.64805 | -0.0001  |
| C  | 0.96367  | -1.4153  | 0.00002  |
| C  | 1.14175  | -0.01317 | -0.00007 |
| C  | -0.1058  | 0.64348  | -0.0001  |
| C  | -1.1024  | -0.4399  | -0.00022 |
| C  | 2.36936  | 0.63518  | -0.00002 |
| C  | -0.1342  | 2.01387  | -0.00002 |
| C  | 1.10752  | 2.70952  | 0.00005  |
| C  | 2.32206  | 2.05768  | 0.00002  |
| C  | 2.08631  | -2.20587 | 0.0001   |
| C  | 3.36438  | -1.57561 | 0.00005  |
| C  | 3.51806  | -0.20719 | -0.00001 |
| H  | 4.24733  | -2.20402 | 0.00008  |
| H  | 4.51094  | 0.22903  | 0.00004  |
| H  | 3.24392  | 2.62913  | 0.00006  |
| H  | -0.98511 | -2.6085  | -0.00016 |
| H  | -1.0682  | 2.56484  | -0.00003 |
| H  | 1.09125  | 3.79281  | 0.00008  |
| H  | 2.02494  | -3.2883  | 0.00012  |
| Br | -2.95147 | -0.12694 | 0.00005  |

No. 21

|   |          |          |          |
|---|----------|----------|----------|
| C | -0.05492 | 2.0265   | 0.00014  |
| C | -0.12169 | 0.55689  | -0.00003 |
| C | 1.21608  | 0.09746  | 0.00015  |
| C | 2.09904  | 1.19981  | 0.00003  |
| C | 1.24698  | 2.40327  | 0.00024  |
| C | 1.6084   | -1.23366 | 0.00014  |
| C | 3.44834  | 0.943    | -0.00012 |
| C | 3.88795  | -0.41153 | -0.00029 |
| C | 3.01097  | -1.47349 | -0.0001  |

|    |          |          |          |
|----|----------|----------|----------|
| C  | -1.10032 | -0.40143 | -0.00015 |
| C  | -0.75481 | -1.78206 | 0.00014  |
| C  | 0.55775  | -2.19375 | 0.00031  |
| H  | -1.55362 | -2.51257 | 0.00016  |
| H  | 0.78626  | -3.2539  | 0.00026  |
| H  | 3.38649  | -2.4908  | -0.00014 |
| H  | -0.91491 | 2.68079  | 0.00028  |
| H  | 4.18184  | 1.74166  | -0.00018 |
| H  | 4.9535   | -0.60796 | -0.0004  |
| H  | 1.61154  | 3.42086  | 0.00011  |
| Br | -2.93468 | 0.07531  | -0.00008 |

No. 22

|   |          |          |          |
|---|----------|----------|----------|
| C | 1.66991  | 2.46156  | 0.00004  |
| C | 0.67555  | 1.3706   | 0.       |
| C | 1.41725  | 0.16847  | -0.00001 |
| C | 2.80007  | 0.44943  | 0.       |
| C | 2.91249  | 1.92194  | -0.00005 |
| C | 0.86343  | -1.10352 | -0.00001 |
| C | 3.67324  | -0.60989 | 0.00001  |
| C | 3.14065  | -1.93161 | 0.00002  |
| C | 1.7875   | -2.18728 | 0.00001  |
| C | -0.69398 | 1.29211  | 0.00001  |
| C | -1.28017 | -0.00504 | -0.00001 |
| C | -0.55795 | -1.17495 | -0.00002 |
| H | -1.06607 | -2.13155 | -0.00002 |
| H | 1.4254   | -3.20934 | 0.00001  |
| H | 1.43296  | 3.51615  | 0.00007  |
| H | 4.74813  | -0.46768 | 0.00001  |
| H | 3.83249  | -2.76565 | 0.00003  |
| H | 3.84269  | 2.47272  | -0.00005 |

|    |          |          |         |
|----|----------|----------|---------|
| H  | -1.33343 | 2.16625  | 0.00002 |
| Br | -3.18086 | -0.09977 | 0.      |

No. 23

|    |          |          |          |
|----|----------|----------|----------|
| C  | 3.08667  | 1.59443  | -0.00007 |
| C  | 1.61598  | 1.48597  | -0.00003 |
| C  | 1.3257   | 0.10393  | -0.00001 |
| C  | 2.52646  | -0.6421  | 0.00002  |
| C  | 3.61985  | 0.34919  | 0.0001   |
| C  | 0.05146  | -0.45439 | -0.00001 |
| C  | 2.4392   | -2.01145 | 0.       |
| C  | 1.14833  | -2.61195 | -0.00003 |
| C  | -0.0146  | -1.87499 | -0.00002 |
| C  | 0.56267  | 2.36557  | 0.       |
| C  | -0.7618  | 1.84846  | 0.00001  |
| C  | -1.01034 | 0.49478  | 0.       |
| H  | -0.97748 | -2.37103 | -0.00003 |
| H  | 3.63913  | 2.52349  | -0.00007 |
| H  | 3.32178  | -2.64151 | 0.00002  |
| H  | 1.08217  | -3.69349 | -0.00004 |
| H  | 4.67374  | 0.1082   | 0.00013  |
| H  | 0.7073   | 3.44001  | -0.00001 |
| H  | -1.59823 | 2.53534  | 0.00003  |
| Br | -2.81103 | -0.10817 | 0.00001  |

No. 24

|   |         |          |         |
|---|---------|----------|---------|
| C | 3.10184 | -0.26323 | 0.00004 |
| C | 1.91715 | 0.68527  | 0.00001 |
| C | 0.72747 | -0.07271 | 0.00001 |
| C | 0.97175 | -1.4612  | 0.00001 |
| C | 2.4702  | -1.69717 | 0.      |

|    |          |          |          |
|----|----------|----------|----------|
| C  | -0.56065 | 0.50853  | 0.       |
| C  | -0.09968 | -2.31957 | 0.       |
| C  | -1.41218 | -1.78176 | -0.00001 |
| C  | -1.63517 | -0.42192 | -0.00001 |
| C  | 1.83222  | 2.05573  | 0.       |
| C  | 0.54823  | 2.66068  | -0.00001 |
| C  | -0.61865 | 1.92484  | -0.00001 |
| H  | 0.48574  | 3.74442  | -0.00002 |
| H  | -1.58106 | 2.42202  | -0.00002 |
| H  | 3.73965  | -0.10643 | 0.8766   |
| H  | 3.73973  | -0.10641 | -0.87646 |
| H  | 2.76278  | -2.23297 | 0.87876  |
| H  | 2.71899  | 2.68172  | 0.       |
| H  | 0.02679  | -3.39736 | 0.       |
| H  | -2.26353 | -2.45238 | -0.00001 |
| H  | -2.64129 | -0.05774 | -0.00002 |
| Br | 2.99247  | -2.65352 | -1.56867 |

No. 25

|   |          |          |          |
|---|----------|----------|----------|
| C | 1.33248  | 2.43799  | 0.00005  |
| C | 2.11401  | 1.13849  | 0.00002  |
| C | 1.20584  | 0.06097  | 0.00012  |
| C | -0.13449 | 0.49934  | 0.00012  |
| C | -0.16893 | 2.00829  | 0.00016  |
| C | 1.59168  | -1.28735 | 0.00008  |
| C | -1.11026 | -0.45524 | 0.00003  |
| C | -0.77091 | -1.83479 | 0.00005  |
| C | 0.5407   | -2.24372 | 0.00009  |
| C | 3.4567   | 0.8629   | -0.00014 |
| C | 3.87796  | -0.49478 | -0.00013 |
| C | 2.98719  | -1.54382 | -0.00001 |

|    |          |          |          |
|----|----------|----------|----------|
| H  | 4.94113  | -0.70642 | -0.00023 |
| H  | 3.34666  | -2.56674 | -0.00004 |
| H  | 0.77325  | -3.30279 | 0.00006  |
| H  | -1.57009 | -2.56533 | 0.00001  |
| H  | 1.57417  | 3.03974  | -0.87859 |
| H  | 1.57472  | 3.03998  | 0.87839  |
| H  | -0.70215 | 2.38213  | 0.87747  |
| H  | -0.70188 | 2.38224  | -0.87726 |
| H  | 4.19839  | 1.65378  | -0.00024 |
| Br | -2.94189 | 0.0501   | -0.00006 |

No. 26

|   |          |          |          |
|---|----------|----------|----------|
| C | -3.04321 | 1.81652  | 0.00002  |
| C | -2.77864 | 0.32407  | 0.       |
| C | -1.38686 | 0.11006  | -0.00015 |
| C | -0.65578 | 1.31474  | -0.00009 |
| C | -1.62813 | 2.47731  | -0.00011 |
| C | -0.79109 | -1.1597  | -0.00015 |
| C | 0.71263  | 1.26502  | 0.00004  |
| C | 1.32539  | -0.01647 | -0.00005 |
| C | 0.62866  | -1.19922 | -0.00017 |
| C | -3.61087 | -0.76513 | 0.00018  |
| C | -3.0344  | -2.06442 | 0.0001   |
| C | -1.67375 | -2.27111 | -0.00008 |
| H | -3.69552 | -2.92365 | 0.00021  |
| H | -1.27293 | -3.27835 | -0.00007 |
| H | 1.15376  | -2.14625 | -0.00017 |
| H | -3.6209  | 2.11118  | 0.87874  |
| H | -3.6217  | 2.11099  | -0.87825 |
| H | -1.48022 | 3.10889  | -0.87858 |
| H | -1.48063 | 3.10869  | 0.87857  |

|    |          |          |         |
|----|----------|----------|---------|
| H  | -4.68963 | -0.65744 | 0.00033 |
| H  | 1.3301   | 2.15453  | 0.00012 |
| Br | 3.2284   | -0.07367 | 0.00006 |

No. 27

|    |          |          |          |
|----|----------|----------|----------|
| C  | 3.65738  | -0.17279 | -0.00012 |
| C  | 2.44165  | 0.73249  | -0.00008 |
| C  | 1.27857  | -0.06475 | -0.00025 |
| C  | 1.57583  | -1.44235 | -0.00008 |
| C  | 3.08018  | -1.62258 | -0.00015 |
| C  | -0.02345 | 0.46637  | -0.00018 |
| C  | 0.54112  | -2.3391  | 0.00025  |
| C  | -0.79135 | -1.849   | 0.00013  |
| C  | -1.0631  | -0.50229 | -0.00011 |
| C  | 2.30992  | 2.0958   | 0.00022  |
| C  | 1.00411  | 2.65431  | 0.00013  |
| C  | -0.1334  | 1.88018  | -0.00009 |
| H  | 0.90138  | 3.73344  | 0.00031  |
| H  | -1.11207 | 2.34299  | -0.00004 |
| H  | 4.27942  | 0.01019  | 0.87867  |
| H  | 4.28007  | 0.01135  | -0.87821 |
| H  | 3.40581  | -2.18414 | -0.87845 |
| H  | 3.40616  | -2.18312 | 0.87866  |
| H  | 3.17421  | 2.75039  | 0.00041  |
| H  | 0.70961  | -3.40978 | 0.00046  |
| H  | -1.61546 | -2.55112 | 0.0003   |
| Br | -2.87696 | 0.07035  | 0.       |

**Frequencies of Cl-PAHs at M06-2X/6-311++G(d,p) level without scale**

No.1

190.2340

299.1523

417.9241



|           |           |           |
|-----------|-----------|-----------|
| 422.7575  | 483.9694  | 624.0565  |
| 710.6652  | 720.4507  | 766.9422  |
| 860.5146  | 936.9603  | 998.9136  |
| 1017.0345 | 1018.2436 | 1059.0558 |
| 1108.8581 | 1127.1400 | 1180.9412 |
| 1201.2001 | 1320.6177 | 1344.6692 |
| 1491.6247 | 1522.5492 | 1665.1296 |
| 1668.1485 | 3189.8064 | 3198.9842 |
| 3210.4988 | 3220.0530 | 3222.0138 |

No.2

|           |           |           |
|-----------|-----------|-----------|
| 153.0039  | 166.4044  | 242.3630  |
| 254.5619  | 372.8043  | 446.2919  |
| 450.7072  | 525.1675  | 559.4291  |
| 696.4242  | 716.9219  | 772.1370  |
| 820.9578  | 883.0942  | 969.7330  |
| 1014.5089 | 1014.5757 | 1066.1509 |
| 1073.4098 | 1082.7897 | 1165.3917 |
| 1183.9402 | 1247.6584 | 1309.2175 |
| 1320.3332 | 1426.4427 | 1470.4114 |
| 1488.1777 | 1506.2865 | 1528.6219 |
| 1651.7269 | 1679.4044 | 3063.0253 |
| 3128.1667 | 3149.6640 | 3184.7573 |
| 3196.5061 | 3207.3718 | 3216.3894 |

No.3

|           |           |           |
|-----------|-----------|-----------|
| 65.3844   | 174.0008  | 214.7514  |
| 233.5278  | 388.8149  | 421.2838  |
| 444.5010  | 525.7343  | 545.1797  |
| 698.7583  | 705.5258  | 799.8330  |
| 878.1006  | 902.7060  | 926.5838  |
| 1007.6559 | 1015.8451 | 1020.1874 |
| 1063.0522 | 1118.6630 | 1132.0584 |

|           |           |           |
|-----------|-----------|-----------|
| 1192.8277 | 1249.5682 | 1307.0448 |
| 1337.6816 | 1416.2195 | 1462.2179 |
| 1499.1731 | 1504.5382 | 1528.5302 |
| 1654.8241 | 1681.0184 | 3056.9528 |
| 3123.8992 | 3143.6381 | 3184.7405 |
| 3201.0580 | 3202.8855 | 3222.1813 |

No.4

|           |           |           |
|-----------|-----------|-----------|
| 56.1171   | 120.2289  | 251.6492  |
| 308.2562  | 377.6382  | 384.6613  |
| 421.6517  | 499.3764  | 645.4515  |
| 647.0950  | 729.5555  | 824.3372  |
| 833.2601  | 853.5497  | 970.1813  |
| 994.5738  | 1010.7871 | 1036.6547 |
| 1067.9940 | 1130.9287 | 1137.1131 |
| 1206.1382 | 1249.5512 | 1316.6187 |
| 1329.9611 | 1418.7813 | 1446.6850 |
| 1496.2548 | 1500.7320 | 1543.2614 |
| 1658.5268 | 1680.7722 | 3052.6220 |
| 3115.9493 | 3147.6304 | 3179.7769 |
| 3181.1452 | 3215.6388 | 3216.4579 |

No.5

|           |           |           |
|-----------|-----------|-----------|
| 115.9851  | 171.7955  | 222.9097  |
| 235.2230  | 399.3637  | 419.4715  |
| 431.3779  | 476.8030  | 520.4688  |
| 545.8267  | 560.7953  | 638.0188  |
| 680.2947  | 751.7690  | 785.7092  |
| 801.1330  | 816.8795  | 847.9995  |
| 889.9457  | 933.6779  | 983.6757  |
| 997.3225  | 1008.4038 | 1021.9260 |
| 1054.8592 | 1093.0799 | 1165.9423 |
| 1171.8659 | 1191.3970 | 1233.4986 |

|           |           |           |
|-----------|-----------|-----------|
| 1237.1819 | 1283.7868 | 1376.7087 |
| 1413.8680 | 1420.7054 | 1476.9034 |
| 1502.1469 | 1559.7142 | 1645.8569 |
| 1673.1475 | 1704.3384 | 3185.2495 |
| 3185.5130 | 3195.7091 | 3201.7281 |
| 3211.8525 | 3219.2986 | 3230.4329 |

No.6

|           |           |           |
|-----------|-----------|-----------|
| 100.7502  | 179.1533  | 217.3406  |
| 274.5138  | 360.4742  | 405.5756  |
| 418.5067  | 486.4376  | 523.3486  |
| 523.4837  | 613.3895  | 647.9133  |
| 654.0706  | 766.5023  | 780.7556  |
| 790.2363  | 830.6631  | 866.8456  |
| 883.8133  | 913.6214  | 955.7112  |
| 985.0422  | 999.0988  | 1015.7698 |
| 1049.8527 | 1109.5309 | 1156.0005 |
| 1162.4210 | 1179.4111 | 1216.8542 |
| 1260.6963 | 1287.6742 | 1380.7887 |
| 1398.5888 | 1427.4526 | 1477.2680 |
| 1500.0295 | 1557.0762 | 1651.3717 |
| 1671.1320 | 1705.8750 | 3178.8297 |
| 3191.6084 | 3193.9344 | 3200.9739 |
| 3208.5466 | 3210.0090 | 3212.7074 |

No.7

|          |          |          |
|----------|----------|----------|
| 83.6299  | 91.9828  | 166.0478 |
| 186.8438 | 246.8975 | 281.5141 |
| 294.3782 | 378.1615 | 404.7892 |
| 433.4007 | 455.2796 | 485.6160 |
| 500.8210 | 542.7456 | 564.0996 |
| 589.7580 | 624.6105 | 655.5835 |
| 696.4425 | 739.6082 | 764.5506 |

|           |           |           |
|-----------|-----------|-----------|
| 771.5106  | 798.6868  | 798.9838  |
| 861.6949  | 868.9285  | 913.6977  |
| 924.7212  | 926.2344  | 933.0972  |
| 961.5217  | 998.5604  | 1002.3932 |
| 1014.6477 | 1034.3820 | 1075.0071 |
| 1145.7721 | 1153.3930 | 1184.1801 |
| 1192.7121 | 1200.4654 | 1260.1042 |
| 1296.4252 | 1306.1803 | 1346.0660 |
| 1369.9339 | 1399.2890 | 1444.3122 |
| 1455.9564 | 1474.2069 | 1498.9219 |
| 1521.5295 | 1605.8246 | 1633.3759 |
| 1659.1826 | 1703.7556 | 1712.4354 |
| 3179.5349 | 3183.9069 | 3185.3069 |
| 3190.6936 | 3200.9102 | 3204.2742 |
| 3211.5260 | 3217.1521 | 3219.9437 |

No.8

|           |           |           |
|-----------|-----------|-----------|
| 57.7377   | 113.8158  | 160.2355  |
| 168.4657  | 253.3127  | 283.7930  |
| 317.8270  | 335.1891  | 396.5490  |
| 422.7103  | 474.3348  | 480.6847  |
| 490.6412  | 533.7891  | 562.4250  |
| 612.3823  | 627.7054  | 645.9588  |
| 719.9436  | 742.8101  | 769.8669  |
| 778.6397  | 779.1475  | 829.8016  |
| 841.7915  | 868.1631  | 890.4889  |
| 919.2144  | 923.1232  | 933.3659  |
| 949.7112  | 1001.2129 | 1005.5140 |
| 1019.4877 | 1034.8013 | 1094.9194 |
| 1143.2334 | 1150.4374 | 1183.6841 |
| 1195.7538 | 1211.8373 | 1284.0871 |
| 1296.4784 | 1300.2545 | 1334.1873 |

|           |           |           |
|-----------|-----------|-----------|
| 1368.9677 | 1391.7503 | 1443.6355 |
| 1466.0508 | 1475.8916 | 1495.8060 |
| 1522.9265 | 1606.1925 | 1633.5189 |
| 1655.9717 | 1702.9917 | 1711.6066 |
| 3178.7904 | 3181.3891 | 3183.1200 |
| 3188.2908 | 3192.1493 | 3200.6774 |
| 3208.0069 | 3216.7838 | 3232.2952 |

No.9

|           |           |           |
|-----------|-----------|-----------|
| 79.2749   | 113.5585  | 128.5102  |
| 234.0033  | 234.7644  | 240.5636  |
| 292.9577  | 393.0028  | 401.7160  |
| 419.4108  | 426.4355  | 485.6438  |
| 499.4484  | 554.8168  | 562.8559  |
| 594.6118  | 613.1760  | 649.4469  |
| 682.4587  | 743.4553  | 754.1162  |
| 778.5858  | 779.4258  | 850.1244  |
| 862.7174  | 867.7789  | 876.6558  |
| 919.6751  | 931.4474  | 955.9722  |
| 1000.9487 | 1003.9912 | 1015.9443 |
| 1017.1697 | 1042.8543 | 1044.2315 |
| 1137.1164 | 1160.0503 | 1184.9362 |
| 1200.4416 | 1208.3077 | 1254.0041 |
| 1292.8376 | 1305.1456 | 1345.0384 |
| 1355.6050 | 1414.9044 | 1424.7464 |
| 1455.5248 | 1485.1144 | 1494.4672 |
| 1525.6550 | 1598.2153 | 1623.8410 |
| 1654.5381 | 1705.7694 | 1706.1355 |
| 3176.9662 | 3181.6161 | 3182.1245 |
| 3189.8865 | 3190.1012 | 3207.1603 |
| 3207.3417 | 3225.1743 | 3225.7450 |

No.10

|           |           |           |
|-----------|-----------|-----------|
| 78.5378   | 93.8967   | 124.8796  |
| 218.8785  | 238.9778  | 248.1782  |
| 301.8856  | 359.7519  | 414.5767  |
| 415.0095  | 445.4766  | 478.8532  |
| 521.1307  | 556.8247  | 564.2071  |
| 603.2261  | 616.1842  | 629.5766  |
| 728.5266  | 734.8052  | 760.4875  |
| 772.5632  | 775.2183  | 792.5280  |
| 874.2597  | 875.4415  | 880.3451  |
| 912.3879  | 958.6835  | 982.4275  |
| 990.7790  | 1014.3449 | 1018.2547 |
| 1020.6430 | 1074.2198 | 1081.5201 |
| 1133.4076 | 1176.0857 | 1184.0990 |
| 1192.2783 | 1222.7798 | 1233.2430 |
| 1280.8816 | 1304.2607 | 1323.5241 |
| 1370.0161 | 1392.4586 | 1414.1052 |
| 1470.6658 | 1491.0978 | 1493.4320 |
| 1543.2940 | 1590.4653 | 1646.6213 |
| 1675.4141 | 1690.7541 | 1693.8546 |
| 3184.7384 | 3192.6835 | 3198.1461 |
| 3204.1086 | 3205.4764 | 3208.7337 |
| 3214.8711 | 3220.6103 | 3236.8579 |

No.11

|          |          |          |
|----------|----------|----------|
| 60.9421  | 103.3810 | 169.1700 |
| 195.9047 | 237.6776 | 253.3721 |
| 284.6933 | 401.8335 | 411.5857 |
| 426.0611 | 481.6479 | 490.9116 |
| 504.4829 | 525.9649 | 574.8041 |
| 581.0686 | 600.1696 | 655.7501 |
| 712.3705 | 724.8994 | 764.0590 |
| 768.4245 | 808.0702 | 812.5914 |

|           |           |           |
|-----------|-----------|-----------|
| 834.6252  | 847.6176  | 887.9718  |
| 890.9838  | 921.0345  | 980.3200  |
| 999.0488  | 1005.6631 | 1014.9263 |
| 1045.9116 | 1073.1533 | 1101.1329 |
| 1140.3880 | 1170.5485 | 1183.9880 |
| 1201.2263 | 1219.3852 | 1237.3038 |
| 1255.8644 | 1294.5388 | 1324.3013 |
| 1367.2760 | 1393.4108 | 1427.7809 |
| 1455.0064 | 1487.6138 | 1496.4266 |
| 1543.6773 | 1583.3634 | 1641.2901 |
| 1671.1333 | 1688.6754 | 1699.7377 |
| 3176.6398 | 3189.0166 | 3191.5282 |
| 3200.0815 | 3210.8195 | 3211.4370 |
| 3213.4106 | 3225.4600 | 3234.3512 |

No.12

|           |           |           |
|-----------|-----------|-----------|
| 61.2040   | 96.4012   | 169.0907  |
| 170.1366  | 230.9358  | 278.3946  |
| 312.3142  | 360.2415  | 401.6937  |
| 440.2285  | 463.7259  | 504.0715  |
| 516.6437  | 528.4965  | 540.0673  |
| 561.1188  | 622.8432  | 662.7667  |
| 716.0557  | 737.0865  | 762.5593  |
| 764.2076  | 776.6224  | 831.1610  |
| 835.7291  | 870.3209  | 880.1187  |
| 900.6241  | 914.6332  | 976.7597  |
| 987.6735  | 1008.1605 | 1015.1102 |
| 1019.3439 | 1072.8403 | 1121.3419 |
| 1137.7225 | 1169.4952 | 1179.8899 |
| 1197.1492 | 1210.5282 | 1243.9751 |
| 1280.1807 | 1297.4778 | 1327.6025 |
| 1377.6559 | 1387.2044 | 1422.8582 |

|           |           |           |
|-----------|-----------|-----------|
| 1464.1516 | 1484.0056 | 1500.1296 |
| 1542.3260 | 1584.3383 | 1646.3606 |
| 1673.1527 | 1689.8153 | 1700.1125 |
| 3178.4340 | 3182.2603 | 3190.0348 |
| 3191.5355 | 3197.5534 | 3203.9537 |
| 3207.1627 | 3221.1522 | 3233.4706 |

No.13

|           |           |           |
|-----------|-----------|-----------|
| 61.4049   | 102.9398  | 155.3235  |
| 163.2794  | 244.3921  | 288.6924  |
| 319.4713  | 352.9428  | 417.0310  |
| 428.8174  | 436.7092  | 469.3099  |
| 515.7765  | 529.1797  | 564.5608  |
| 611.1574  | 631.2852  | 645.9805  |
| 715.9387  | 730.1887  | 756.8881  |
| 761.5503  | 782.8287  | 818.1351  |
| 859.3974  | 870.7329  | 879.8099  |
| 893.1324  | 895.8371  | 978.1487  |
| 989.8569  | 1005.9167 | 1014.0535 |
| 1036.3923 | 1070.8896 | 1121.1353 |
| 1136.1820 | 1168.3936 | 1176.5971 |
| 1194.7470 | 1219.8068 | 1244.7155 |
| 1272.7696 | 1295.1971 | 1318.8453 |
| 1370.5234 | 1389.3398 | 1438.9933 |
| 1464.7985 | 1474.3524 | 1494.6302 |
| 1549.8174 | 1578.6670 | 1643.1644 |
| 1673.9577 | 1687.8093 | 1699.2358 |
| 3170.4053 | 3180.8151 | 3189.3686 |
| 3191.4683 | 3199.7369 | 3203.2522 |
| 3214.9785 | 3221.0383 | 3240.6285 |

No.14

|         |         |          |
|---------|---------|----------|
| 46.1314 | 90.6400 | 166.6872 |
|---------|---------|----------|



|           |           |           |
|-----------|-----------|-----------|
| 220.1774  | 223.6532  | 259.2592  |
| 295.0923  | 380.7461  | 411.9527  |
| 446.6228  | 465.1563  | 500.2160  |
| 507.3129  | 515.5804  | 554.2106  |
| 576.9433  | 611.2879  | 660.0036  |
| 715.9471  | 728.8405  | 761.3527  |
| 774.4705  | 781.6407  | 798.6444  |
| 844.9838  | 849.9141  | 889.7740  |
| 925.2351  | 943.2425  | 987.6227  |
| 999.3695  | 1009.8101 | 1014.8583 |
| 1016.7682 | 1085.2633 | 1126.0770 |
| 1129.5778 | 1169.0226 | 1176.3498 |
| 1198.8721 | 1214.9233 | 1232.6931 |
| 1247.2046 | 1290.0563 | 1323.2326 |
| 1346.8125 | 1369.8655 | 1442.3210 |
| 1448.2145 | 1474.1608 | 1494.7627 |
| 1546.5193 | 1585.1334 | 1635.3131 |
| 1671.8691 | 1685.5743 | 1701.7185 |
| 3174.0186 | 3186.5179 | 3189.3522 |
| 3190.9857 | 3201.1538 | 3206.4232 |
| 3208.3155 | 3212.4621 | 3289.6561 |

No.15

|          |          |          |
|----------|----------|----------|
| 81.4181  | 110.6483 | 145.3660 |
| 201.0768 | 246.8032 | 266.5808 |
| 274.2724 | 398.2064 | 429.7673 |
| 444.9732 | 476.7305 | 511.1465 |
| 540.3478 | 565.7075 | 589.9805 |
| 636.6344 | 686.1693 | 704.0825 |
| 740.6220 | 776.1502 | 807.7316 |
| 810.6231 | 836.3870 | 863.1333 |
| 891.3423 | 929.9100 | 940.2957 |

|           |           |           |
|-----------|-----------|-----------|
| 982.5756  | 997.1470  | 1011.3603 |
| 1050.8362 | 1061.2115 | 1090.9521 |
| 1133.3142 | 1158.9644 | 1170.4754 |
| 1176.7056 | 1195.4480 | 1203.7136 |
| 1227.1966 | 1244.9030 | 1308.9752 |
| 1326.1571 | 1349.2844 | 1376.6982 |
| 1444.3356 | 1477.2098 | 1496.2005 |
| 1522.2053 | 1529.0026 | 1647.8293 |
| 1660.6253 | 1689.8404 | 1693.9865 |
| 3058.0102 | 3093.4212 | 3178.3644 |
| 3181.5618 | 3186.9371 | 3194.0885 |
| 3210.4939 | 3216.4592 | 3219.5944 |

No.16

|           |           |           |
|-----------|-----------|-----------|
| 57.3228   | 133.5620  | 161.9191  |
| 179.9023  | 239.8045  | 274.8854  |
| 327.6764  | 355.6310  | 425.4047  |
| 436.6269  | 497.5450  | 507.3391  |
| 512.9377  | 560.0973  | 582.8693  |
| 650.2011  | 684.4004  | 709.7572  |
| 747.1785  | 768.9933  | 782.0713  |
| 838.0866  | 844.4991  | 881.9427  |
| 891.7284  | 894.8273  | 950.8412  |
| 974.4827  | 984.6623  | 1008.7144 |
| 1028.4731 | 1056.2452 | 1106.6407 |
| 1127.9957 | 1152.1237 | 1169.0930 |
| 1172.1778 | 1196.9975 | 1212.7487 |
| 1232.4274 | 1263.2002 | 1304.1910 |
| 1323.4513 | 1335.5968 | 1369.1244 |
| 1450.5796 | 1464.3232 | 1495.4962 |
| 1513.5012 | 1531.7529 | 1647.5991 |
| 1657.7468 | 1685.5042 | 1688.4424 |

|           |           |           |
|-----------|-----------|-----------|
| 3071.5284 | 3109.5022 | 3173.4898 |
| 3188.4389 | 3191.1821 | 3197.2779 |
| 3198.2297 | 3209.4055 | 3212.6023 |

No.17

|           |           |           |
|-----------|-----------|-----------|
| 78.0776   | 108.8805  | 148.1580  |
| 184.3948  | 257.6896  | 304.4868  |
| 304.6997  | 349.3958  | 426.4043  |
| 439.6316  | 466.2299  | 493.3347  |
| 510.9413  | 599.7978  | 601.4136  |
| 640.1805  | 690.2154  | 703.8469  |
| 747.1941  | 787.3166  | 790.8765  |
| 824.5225  | 825.4124  | 872.2928  |
| 897.3087  | 903.4267  | 940.8553  |
| 977.6041  | 990.6435  | 1012.3347 |
| 1038.2112 | 1060.2459 | 1108.6300 |
| 1128.3312 | 1148.2865 | 1160.5958 |
| 1173.9092 | 1189.8869 | 1216.1952 |
| 1230.9081 | 1266.0770 | 1293.1211 |
| 1325.9506 | 1346.0316 | 1367.7230 |
| 1446.0630 | 1462.4458 | 1493.9913 |
| 1525.4438 | 1529.1627 | 1649.3349 |
| 1660.2315 | 1684.7514 | 1694.7466 |
| 3049.5999 | 3086.5077 | 3179.1889 |
| 3187.6690 | 3196.4267 | 3202.7941 |
| 3206.3444 | 3208.5832 | 3212.4954 |

No.18

|          |          |          |
|----------|----------|----------|
| 74.6748  | 106.7980 | 171.2060 |
| 197.3497 | 232.9177 | 286.9606 |
| 290.0437 | 381.7569 | 427.2351 |
| 465.1269 | 476.6248 | 520.2357 |
| 532.6833 | 553.0088 | 577.6472 |

|           |           |           |
|-----------|-----------|-----------|
| 641.8566  | 671.5320  | 710.0272  |
| 752.4193  | 780.6481  | 789.5474  |
| 792.3564  | 843.1348  | 888.5712  |
| 920.5466  | 921.2166  | 956.9421  |
| 984.8193  | 997.9556  | 1015.1904 |
| 1026.1162 | 1067.1865 | 1102.6889 |
| 1135.1390 | 1157.4627 | 1167.2153 |
| 1179.1844 | 1192.0051 | 1201.5647 |
| 1229.8601 | 1260.5875 | 1286.1934 |
| 1327.6706 | 1349.2956 | 1378.6830 |
| 1444.0504 | 1472.6962 | 1493.6448 |
| 1519.4705 | 1527.6898 | 1647.2575 |
| 1660.4510 | 1684.2609 | 1689.7485 |
| 3046.5927 | 3084.4169 | 3181.1119 |
| 3182.3977 | 3192.5599 | 3200.5267 |
| 3205.5162 | 3229.8243 | 3239.5369 |

No.19

|           |           |           |
|-----------|-----------|-----------|
| 68.6742   | 110.0141  | 118.6214  |
| 166.4583  | 205.5097  | 294.2662  |
| 325.8555  | 421.2666  | 426.9609  |
| 441.0152  | 483.4467  | 515.4126  |
| 569.6222  | 589.5784  | 632.7832  |
| 658.0952  | 707.2638  | 757.2460  |
| 758.4478  | 767.5168  | 797.3646  |
| 824.2314  | 859.3396  | 889.3642  |
| 900.3972  | 900.6284  | 976.3494  |
| 977.4686  | 1011.0276 | 1012.5490 |
| 1028.2749 | 1054.5335 | 1056.7273 |
| 1120.9371 | 1136.6793 | 1172.6324 |
| 1177.3859 | 1196.1365 | 1211.4906 |
| 1228.3898 | 1242.1414 | 1261.3475 |

|           |           |           |
|-----------|-----------|-----------|
| 1319.7165 | 1321.5583 | 1335.4625 |
| 1382.6270 | 1491.0162 | 1492.9954 |
| 1522.7792 | 1531.6381 | 1654.8300 |
| 1662.0476 | 1685.1212 | 1685.4175 |
| 3117.7034 | 3201.2349 | 3201.8993 |
| 3207.3551 | 3208.4239 | 3216.4947 |
| 3217.2519 | 3227.3265 | 3227.6554 |

No.20

|           |           |           |
|-----------|-----------|-----------|
| 104.2941  | 161.3106  | 174.8223  |
| 217.8741  | 291.1719  | 361.0096  |
| 408.9384  | 454.5949  | 458.4793  |
| 528.8848  | 540.4478  | 574.8271  |
| 586.2404  | 632.3688  | 666.8848  |
| 689.0428  | 764.4206  | 773.1543  |
| 779.3832  | 818.1015  | 829.0932  |
| 850.7172  | 937.5130  | 944.0639  |
| 952.8931  | 1005.7133 | 1014.4088 |
| 1036.8850 | 1061.5136 | 1066.1809 |
| 1110.9271 | 1169.4883 | 1205.4840 |
| 1217.7150 | 1249.0676 | 1282.9200 |
| 1298.2073 | 1398.9930 | 1420.5619 |
| 1453.8057 | 1486.0424 | 1511.1944 |
| 1534.7751 | 1583.2081 | 1678.7308 |
| 1695.2669 | 1706.1089 | 3173.0337 |
| 3185.3848 | 3189.9697 | 3197.7054 |
| 3212.6928 | 3216.2214 | 3230.3340 |

No.21

|          |          |          |
|----------|----------|----------|
| 85.9428  | 189.1966 | 200.9940 |
| 226.4472 | 271.2124 | 353.1190 |
| 393.3683 | 461.0675 | 506.9626 |
| 513.1726 | 540.8398 | 585.3809 |

|           |           |           |
|-----------|-----------|-----------|
| 612.5636  | 613.7127  | 681.4433  |
| 690.4938  | 709.0101  | 736.7979  |
| 780.5896  | 811.6054  | 843.0459  |
| 865.7643  | 916.8518  | 939.0643  |
| 963.8153  | 986.0565  | 1006.8403 |
| 1034.1762 | 1051.2483 | 1105.7832 |
| 1116.7541 | 1150.7937 | 1174.9255 |
| 1208.7351 | 1246.8772 | 1259.2039 |
| 1334.7581 | 1372.1350 | 1424.2306 |
| 1450.4741 | 1480.7646 | 1509.4315 |
| 1528.8262 | 1572.9647 | 1673.7635 |
| 1686.7082 | 1697.9461 | 3172.5804 |
| 3191.2578 | 3191.6424 | 3209.7502 |
| 3210.5573 | 3226.7940 | 3252.0856 |

No.22

|           |           |           |
|-----------|-----------|-----------|
| 96.1599   | 188.6922  | 216.0255  |
| 227.5151  | 267.6486  | 356.3224  |
| 377.8347  | 445.2867  | 471.9157  |
| 495.6943  | 554.0551  | 601.0949  |
| 601.3387  | 613.5121  | 670.6256  |
| 702.5466  | 737.5686  | 754.6673  |
| 784.0892  | 820.5592  | 849.2556  |
| 882.7904  | 901.3470  | 925.4555  |
| 949.2649  | 969.6737  | 1002.0558 |
| 1042.8299 | 1052.9561 | 1081.3251 |
| 1107.5698 | 1118.1001 | 1183.0411 |
| 1223.8972 | 1227.7198 | 1272.6356 |
| 1332.9539 | 1385.6620 | 1407.9806 |
| 1433.1797 | 1480.0593 | 1504.5512 |
| 1523.9244 | 1578.7468 | 1676.8697 |
| 1692.6181 | 1700.3470 | 3181.7578 |

|           |           |           |
|-----------|-----------|-----------|
| 3192.5142 | 3196.0168 | 3204.6299 |
| 3213.7975 | 3231.2545 | 3251.5261 |

No.23

|           |           |           |
|-----------|-----------|-----------|
| 101.1354  | 161.0042  | 209.7955  |
| 217.6531  | 290.6470  | 363.9325  |
| 410.8757  | 458.4170  | 463.7850  |
| 497.9184  | 546.2630  | 585.4029  |
| 599.5451  | 633.0550  | 672.1016  |
| 686.7805  | 733.5211  | 750.0679  |
| 792.7830  | 821.1762  | 828.9335  |
| 872.2094  | 908.4640  | 951.5369  |
| 963.9945  | 977.5831  | 1012.5770 |
| 1039.4601 | 1052.3763 | 1102.6493 |
| 1108.6018 | 1130.8273 | 1196.1635 |
| 1227.1187 | 1239.9900 | 1272.6811 |
| 1325.8741 | 1393.4167 | 1401.7711 |
| 1437.5085 | 1477.5083 | 1506.4906 |
| 1529.1170 | 1579.9555 | 1676.3800 |
| 1685.2137 | 1699.4692 | 3190.1687 |
| 3197.0744 | 3207.5204 | 3213.6857 |
| 3218.2244 | 3227.3118 | 3242.4020 |

No.24

|          |          |           |
|----------|----------|-----------|
| 32.8959  | 135.3671 | 158.0286  |
| 226.1541 | 260.7149 | 317.0505  |
| 421.7096 | 457.3080 | 469.4747  |
| 502.8801 | 513.5149 | 547.6960  |
| 565.2630 | 629.1909 | 663.3988  |
| 682.4372 | 708.6111 | 771.3556  |
| 796.3549 | 814.7419 | 835.6668  |
| 857.6350 | 912.6894 | 937.9962  |
| 968.2041 | 999.3849 | 1004.6092 |

|           |           |           |
|-----------|-----------|-----------|
| 1008.4150 | 1031.8863 | 1039.6809 |
| 1070.8558 | 1115.4491 | 1173.5960 |
| 1194.9452 | 1201.0972 | 1228.8299 |
| 1242.6995 | 1250.0046 | 1277.1077 |
| 1288.6229 | 1309.9092 | 1393.7935 |
| 1406.8513 | 1456.7783 | 1471.8428 |
| 1487.0017 | 1518.4862 | 1553.5880 |
| 1673.2348 | 1681.9079 | 1701.8506 |
| 3081.8952 | 3137.5997 | 3151.8715 |
| 3196.7003 | 3198.8943 | 3207.6776 |
| 3209.9168 | 3218.8169 | 3221.6323 |

No.25

|           |           |           |
|-----------|-----------|-----------|
| 81.9386   | 93.2232   | 193.1625  |
| 200.5701  | 218.8809  | 294.5644  |
| 352.2318  | 448.3074  | 454.2974  |
| 506.8524  | 509.7718  | 528.7373  |
| 562.3100  | 598.4784  | 640.9529  |
| 658.8718  | 692.3605  | 752.1960  |
| 781.2110  | 824.5826  | 837.0540  |
| 847.5581  | 898.4279  | 915.9001  |
| 967.8127  | 984.0552  | 1004.6742 |
| 1022.4036 | 1030.9965 | 1054.6112 |
| 1112.7742 | 1153.5450 | 1175.2606 |
| 1177.2248 | 1206.1367 | 1244.2866 |
| 1245.8943 | 1248.4689 | 1283.0580 |
| 1312.8591 | 1379.4077 | 1404.9831 |
| 1453.0328 | 1469.1296 | 1478.8083 |
| 1497.0948 | 1515.5064 | 1548.4743 |
| 1670.4205 | 1683.9746 | 1697.5814 |
| 3064.5940 | 3090.9483 | 3101.4523 |
| 3130.6351 | 3169.9282 | 3190.4218 |



|           |           |           |
|-----------|-----------|-----------|
| 3191.4558 | 3207.3352 | 3207.7691 |
| No.26     |           |           |
| 61.7005   | 105.0390  | 194.4037  |
| 214.4276  | 225.5236  | 277.7024  |
| 353.6590  | 443.4526  | 453.4535  |
| 463.2585  | 528.1277  | 546.5356  |
| 560.3810  | 589.8390  | 637.9404  |
| 676.8790  | 724.5128  | 750.7863  |
| 789.9070  | 834.9539  | 838.2608  |
| 882.2972  | 886.0971  | 897.8794  |
| 929.2383  | 971.4879  | 1004.7140 |
| 1026.0841 | 1043.8050 | 1052.5793 |
| 1088.4336 | 1119.7535 | 1178.0754 |
| 1184.8626 | 1221.0848 | 1239.5132 |
| 1243.5648 | 1247.6293 | 1284.2421 |
| 1309.4221 | 1388.5571 | 1403.3037 |
| 1423.0657 | 1469.2863 | 1483.9507 |
| 1499.8561 | 1507.3053 | 1548.8865 |
| 1669.0335 | 1679.5748 | 1697.0312 |
| 3062.5152 | 3084.7332 | 3098.5487 |
| 3125.7097 | 3183.8380 | 3194.7288 |
| 3198.9099 | 3205.8165 | 3221.0874 |
| No.27     |           |           |
| 60.3138   | 102.5863  | 166.1677  |
| 212.4007  | 220.9121  | 312.5995  |
| 359.9690  | 456.1641  | 459.0616  |
| 469.2530  | 492.7615  | 536.9932  |
| 588.9755  | 593.5383  | 628.6742  |
| 662.5472  | 722.2954  | 748.3219  |
| 797.5996  | 819.0629  | 833.3132  |
| 861.6684  | 879.4963  | 929.2353  |

|           |           |           |
|-----------|-----------|-----------|
| 963.6628  | 972.1659  | 1006.9484 |
| 1027.4309 | 1037.5218 | 1059.6652 |
| 1105.8315 | 1132.8253 | 1177.7032 |
| 1189.8630 | 1232.5525 | 1242.9126 |
| 1243.6115 | 1245.7923 | 1278.6103 |
| 1301.0339 | 1376.2743 | 1402.7078 |
| 1433.2093 | 1470.1104 | 1475.1467 |
| 1499.2282 | 1513.3752 | 1551.9388 |
| 1664.4314 | 1678.9156 | 1696.2499 |
| 3061.1927 | 3083.4369 | 3096.6843 |
| 3124.1619 | 3187.2744 | 3196.3861 |
| 3202.3839 | 3211.4738 | 3215.7427 |

**Frequencies Br-PAHs at M06-2X/6-311++G(d,p) level without scale**

No.1

|           |           |           |
|-----------|-----------|-----------|
| 173.5518  | 258.2871  | 324.2310  |
| 415.0830  | 472.8159  | 624.3809  |
| 686.6853  | 703.3062  | 759.8470  |
| 861.1345  | 938.7062  | 1004.1473 |
| 1012.5382 | 1021.1920 | 1057.0916 |
| 1108.4147 | 1110.1315 | 1181.8799 |
| 1205.4915 | 1322.4903 | 1345.5044 |
| 1489.5968 | 1519.2199 | 1660.1839 |
| 1667.3702 | 3188.0458 | 3196.4730 |
| 3209.0572 | 3219.0158 | 3220.8277 |

No.2

|           |           |           |
|-----------|-----------|-----------|
| 131.6707  | 143.9750  | 219.0434  |
| 234.6614  | 304.4374  | 416.3809  |
| 444.1775  | 515.8632  | 551.8527  |
| 675.2711  | 712.9809  | 769.8389  |
| 818.0488  | 885.9000  | 973.4029  |
| 1012.0024 | 1013.6091 | 1051.0959 |

|           |           |           |
|-----------|-----------|-----------|
| 1060.0885 | 1083.0170 | 1161.8906 |
| 1185.1051 | 1250.7950 | 1308.3710 |
| 1322.7446 | 1416.2163 | 1468.5933 |
| 1482.7851 | 1504.3448 | 1524.8529 |
| 1649.0073 | 1678.7276 | 3052.5254 |
| 3117.2230 | 3143.5612 | 3183.1963 |
| 3193.5760 | 3207.6397 | 3223.1377 |

No.3

|           |           |           |
|-----------|-----------|-----------|
| 59.0330   | 162.4725  | 200.1990  |
| 212.2744  | 318.0040  | 385.8092  |
| 439.6834  | 522.3758  | 534.0039  |
| 681.5412  | 697.4478  | 793.3639  |
| 856.6297  | 899.9390  | 925.5187  |
| 1006.3504 | 1011.8113 | 1018.1197 |
| 1065.2005 | 1108.1785 | 1131.2476 |
| 1192.2901 | 1242.6117 | 1301.5166 |
| 1332.0920 | 1416.2773 | 1457.4506 |
| 1496.3518 | 1502.3123 | 1522.3830 |
| 1644.3351 | 1671.3492 | 3064.4867 |
| 3129.8391 | 3153.1978 | 3199.9857 |
| 3216.8072 | 3218.5600 | 3238.2988 |

No.4

|           |           |           |
|-----------|-----------|-----------|
| 53.6473   | 109.3758  | 218.7227  |
| 294.4263  | 299.3760  | 369.1853  |
| 417.7685  | 491.9157  | 606.5229  |
| 645.5363  | 713.6765  | 816.2292  |
| 829.4140  | 853.3472  | 968.2872  |
| 997.6545  | 1011.0139 | 1031.2477 |
| 1066.5131 | 1112.7676 | 1139.3834 |
| 1209.7849 | 1248.9237 | 1318.9848 |
| 1331.7170 | 1418.6439 | 1443.8839 |

|           |           |           |
|-----------|-----------|-----------|
| 1496.2007 | 1499.9981 | 1539.0162 |
| 1657.7945 | 1676.5222 | 3052.6654 |
| 3116.1420 | 3147.9701 | 3178.9708 |
| 3180.4280 | 3215.6699 | 3216.6577 |

No.5

|           |           |           |
|-----------|-----------|-----------|
| 112.1199  | 168.7847  | 186.7960  |
| 232.8998  | 310.5357  | 418.7151  |
| 425.9634  | 475.1001  | 521.9614  |
| 537.7518  | 551.3561  | 630.0264  |
| 666.9601  | 754.3168  | 780.5216  |
| 803.2293  | 818.0134  | 835.6211  |
| 890.0504  | 928.2235  | 969.3552  |
| 998.4106  | 1014.1457 | 1022.3172 |
| 1057.8648 | 1093.7303 | 1164.6107 |
| 1170.5228 | 1193.1519 | 1228.4398 |
| 1236.6593 | 1290.6016 | 1378.6262 |
| 1413.0739 | 1422.2645 | 1477.8103 |
| 1501.2363 | 1559.6872 | 1644.4767 |
| 1675.9134 | 1706.3932 | 3179.1182 |
| 3193.5189 | 3202.9241 | 3203.9494 |
| 3208.7359 | 3217.5251 | 3240.7531 |

No.6

|           |           |           |
|-----------|-----------|-----------|
| 94.6966   | 177.3032  | 181.2692  |
| 264.1226  | 277.4350  | 402.4762  |
| 406.1687  | 484.7804  | 514.9338  |
| 522.5732  | 591.1872  | 638.3108  |
| 640.6660  | 762.8810  | 773.9273  |
| 789.2193  | 828.4935  | 849.2607  |
| 883.5818  | 913.4832  | 949.3889  |
| 983.8313  | 998.6133  | 1016.0543 |
| 1048.9271 | 1098.2027 | 1155.6542 |

|           |           |           |
|-----------|-----------|-----------|
| 1163.4552 | 1179.8964 | 1217.3299 |
| 1261.3754 | 1288.1889 | 1379.1311 |
| 1397.0415 | 1426.6896 | 1475.5504 |
| 1495.7764 | 1554.8806 | 1650.2424 |
| 1665.4713 | 1702.7963 | 3176.8593 |
| 3188.0460 | 3190.2219 | 3197.6953 |
| 3203.9187 | 3208.6125 | 3212.1632 |

No.7

|           |           |           |
|-----------|-----------|-----------|
| 60.4758   | 87.9977   | 128.9486  |
| 170.2726  | 240.6736  | 263.5292  |
| 276.1572  | 322.1255  | 397.9390  |
| 409.1401  | 440.4966  | 474.8254  |
| 497.2272  | 542.0698  | 544.9002  |
| 582.8767  | 624.3579  | 654.5436  |
| 678.4965  | 732.4357  | 760.1297  |
| 765.6113  | 792.2028  | 800.2780  |
| 855.2324  | 856.9822  | 901.9176  |
| 910.6045  | 924.6166  | 927.6742  |
| 938.9666  | 995.9776  | 1006.9960 |
| 1016.9089 | 1031.5214 | 1071.1679 |
| 1141.0126 | 1154.1273 | 1183.3617 |
| 1195.2265 | 1199.9930 | 1259.0468 |
| 1297.8251 | 1306.3812 | 1345.0714 |
| 1365.5580 | 1397.2367 | 1436.6811 |
| 1451.2433 | 1469.9618 | 1497.9779 |
| 1519.1174 | 1599.0314 | 1624.6180 |
| 1657.1062 | 1698.7819 | 1710.9896 |
| 3161.8480 | 3169.7835 | 3171.9916 |
| 3175.4270 | 3195.5044 | 3201.5898 |
| 3211.7291 | 3219.4075 | 3225.2196 |

No.8

|           |           |           |
|-----------|-----------|-----------|
| 59.7494   | 110.9325  | 134.9719  |
| 167.0903  | 236.8685  | 249.2261  |
| 299.5842  | 312.5668  | 393.0857  |
| 414.7195  | 450.7661  | 478.2475  |
| 487.8712  | 529.5141  | 552.5560  |
| 604.4337  | 624.1841  | 643.3617  |
| 701.4460  | 739.8101  | 767.1415  |
| 776.3194  | 777.7187  | 821.9216  |
| 838.4763  | 867.4233  | 889.9430  |
| 917.8203  | 922.1714  | 931.6659  |
| 938.8489  | 997.8385  | 1002.7631 |
| 1016.3859 | 1033.4615 | 1084.9741 |
| 1142.4827 | 1149.0993 | 1184.6328 |
| 1193.5444 | 1211.0874 | 1284.1250 |
| 1294.8604 | 1300.0139 | 1333.8202 |
| 1366.2459 | 1390.1434 | 1442.9809 |
| 1464.5516 | 1473.4362 | 1492.7572 |
| 1520.5545 | 1605.4324 | 1632.4394 |
| 1653.5825 | 1698.5057 | 1710.7754 |
| 3178.3029 | 3180.7911 | 3182.6900 |
| 3186.9986 | 3190.3538 | 3200.2583 |
| 3207.4995 | 3212.0025 | 3222.0334 |

No.9

|          |          |          |
|----------|----------|----------|
| 67.2861  | 106.8431 | 114.0554 |
| 185.2256 | 209.8424 | 233.5387 |
| 289.0449 | 329.1623 | 397.0529 |
| 406.3719 | 416.2409 | 483.3114 |
| 498.5234 | 546.2225 | 558.6589 |
| 589.5275 | 613.5879 | 648.8453 |
| 671.9946 | 744.2603 | 751.4184 |
| 776.2131 | 777.2132 | 828.1395 |

|           |           |           |
|-----------|-----------|-----------|
| 858.6370  | 864.4115  | 873.9023  |
| 921.3392  | 930.3889  | 933.0421  |
| 998.1938  | 1001.7376 | 1014.2709 |
| 1015.0148 | 1044.4068 | 1046.0161 |
| 1136.9462 | 1159.8800 | 1184.0551 |
| 1201.1901 | 1209.1174 | 1253.2439 |
| 1289.3293 | 1301.7040 | 1340.5950 |
| 1348.4830 | 1414.3521 | 1420.7653 |
| 1451.6669 | 1484.9230 | 1493.0242 |
| 1525.0904 | 1596.5113 | 1620.4872 |
| 1654.9057 | 1703.8295 | 1706.2289 |
| 3176.7232 | 3182.0109 | 3182.3865 |
| 3189.1485 | 3189.5133 | 3208.6037 |
| 3208.7263 | 3225.9573 | 3226.7228 |

No.10

|           |           |           |
|-----------|-----------|-----------|
| 78.9267   | 96.3222   | 119.1479  |
| 176.1965  | 227.6006  | 238.8442  |
| 295.6254  | 295.9794  | 415.3015  |
| 415.7273  | 444.2366  | 471.8935  |
| 517.8775  | 552.7157  | 561.9679  |
| 598.5586  | 600.1531  | 628.8311  |
| 727.3568  | 732.3561  | 758.9412  |
| 759.0351  | 771.4509  | 788.8921  |
| 865.6236  | 877.1509  | 883.3325  |
| 913.2783  | 936.9148  | 983.7233  |
| 990.4032  | 1010.3985 | 1015.6201 |
| 1021.2566 | 1072.4357 | 1081.8738 |
| 1130.4259 | 1173.4987 | 1183.1654 |
| 1191.7980 | 1222.4383 | 1228.8546 |
| 1282.5411 | 1303.6456 | 1323.0133 |
| 1368.9897 | 1392.9573 | 1409.7572 |

|           |           |           |
|-----------|-----------|-----------|
| 1470.5180 | 1490.5771 | 1493.0595 |
| 1541.0033 | 1589.1184 | 1645.7889 |
| 1673.3424 | 1690.2730 | 1692.9181 |
| 3178.6742 | 3187.8299 | 3197.7459 |
| 3202.8406 | 3206.6763 | 3209.3065 |
| 3218.9271 | 3228.5878 | 3239.3084 |

No.11

|           |           |           |
|-----------|-----------|-----------|
| 59.8516   | 95.9288   | 157.6652  |
| 162.8014  | 236.1949  | 250.1189  |
| 250.9066  | 331.9012  | 410.7936  |
| 422.8116  | 476.1488  | 476.5631  |
| 505.1194  | 522.3252  | 568.8490  |
| 575.3177  | 598.2019  | 647.9859  |
| 711.9311  | 725.4688  | 765.0816  |
| 772.9485  | 790.5870  | 807.3447  |
| 842.3087  | 842.9081  | 888.7153  |
| 889.1673  | 923.3567  | 985.8051  |
| 999.9587  | 1011.5547 | 1017.6973 |
| 1036.0779 | 1075.3941 | 1105.2066 |
| 1136.4015 | 1173.3587 | 1188.9123 |
| 1209.5188 | 1223.2164 | 1241.2394 |
| 1260.6836 | 1295.1983 | 1321.9801 |
| 1367.1914 | 1393.5178 | 1428.7546 |
| 1457.0333 | 1484.5317 | 1495.8586 |
| 1544.2793 | 1585.1710 | 1641.8093 |
| 1670.8751 | 1686.4793 | 1698.4337 |
| 3183.5382 | 3187.3102 | 3196.9731 |
| 3199.0533 | 3207.6075 | 3216.8942 |
| 3223.4301 | 3226.9101 | 3239.5432 |

No.12

|         |         |          |
|---------|---------|----------|
| 58.4148 | 95.2778 | 145.1751 |
|---------|---------|----------|



|           |           |           |
|-----------|-----------|-----------|
| 162.6317  | 225.3425  | 230.0656  |
| 302.8134  | 327.1600  | 398.5449  |
| 438.2548  | 459.8830  | 481.3160  |
| 505.7442  | 526.0480  | 538.1054  |
| 560.4160  | 616.9185  | 653.3338  |
| 713.5250  | 735.8561  | 754.6776  |
| 763.6180  | 776.0617  | 829.7593  |
| 836.1218  | 863.3947  | 880.3211  |
| 900.1309  | 904.2358  | 978.0489  |
| 989.5541  | 1007.8808 | 1015.3218 |
| 1018.6621 | 1072.5875 | 1117.1526 |
| 1133.7971 | 1170.0713 | 1182.5006 |
| 1198.6376 | 1209.6907 | 1243.4067 |
| 1279.6676 | 1298.9355 | 1327.2298 |
| 1376.5962 | 1387.2624 | 1421.2627 |
| 1463.8235 | 1483.3696 | 1498.6514 |
| 1541.4869 | 1581.9478 | 1645.1516 |
| 1669.0144 | 1688.9713 | 1699.8380 |
| 3179.5980 | 3181.2567 | 3187.6824 |
| 3189.6284 | 3196.7977 | 3204.9394 |
| 3206.8623 | 3221.8213 | 3234.4862 |

No.13

|          |          |          |
|----------|----------|----------|
| 69.8013  | 98.8173  | 130.4720 |
| 158.3090 | 240.5126 | 270.9534 |
| 282.6431 | 313.6164 | 416.1590 |
| 422.9344 | 439.2953 | 468.5502 |
| 514.5354 | 527.1892 | 562.8537 |
| 607.0996 | 613.6011 | 635.1922 |
| 715.2465 | 729.2981 | 751.0643 |
| 764.9903 | 785.4488 | 815.2685 |
| 860.0043 | 860.6118 | 888.8070 |

|           |           |           |
|-----------|-----------|-----------|
| 894.3758  | 900.0904  | 985.0348  |
| 991.5015  | 1008.9711 | 1015.6015 |
| 1033.4038 | 1073.7832 | 1116.5755 |
| 1130.8506 | 1169.1652 | 1176.4021 |
| 1193.2176 | 1219.5184 | 1245.0489 |
| 1273.0819 | 1295.7908 | 1321.2980 |
| 1375.3883 | 1388.9565 | 1436.4906 |
| 1467.4499 | 1475.8779 | 1494.6757 |
| 1548.7150 | 1577.0868 | 1645.1176 |
| 1671.0404 | 1689.9031 | 1701.8987 |
| 3179.6926 | 3183.0158 | 3185.9995 |
| 3201.3822 | 3204.5054 | 3207.9513 |
| 3208.3639 | 3223.0276 | 3242.3938 |

No.14

|           |           |           |
|-----------|-----------|-----------|
| 54.5050   | 86.2365   | 155.2850  |
| 188.1351  | 215.7217  | 236.7959  |
| 287.8501  | 330.1916  | 413.8188  |
| 423.8553  | 452.7333  | 497.2243  |
| 504.7689  | 516.8128  | 552.6332  |
| 573.7358  | 607.2701  | 652.5535  |
| 714.8665  | 729.6348  | 759.9254  |
| 763.1076  | 784.5696  | 795.5599  |
| 839.3672  | 847.3761  | 893.8628  |
| 924.4024  | 930.2626  | 988.3405  |
| 994.6459  | 1004.4488 | 1015.6395 |
| 1016.6759 | 1085.3259 | 1120.3857 |
| 1126.6734 | 1169.0985 | 1175.1605 |
| 1198.9787 | 1215.3978 | 1233.0482 |
| 1246.9927 | 1293.3207 | 1324.9033 |
| 1345.3693 | 1371.9181 | 1440.9704 |
| 1446.2662 | 1472.6177 | 1496.5353 |

|           |           |           |
|-----------|-----------|-----------|
| 1545.2157 | 1581.1785 | 1632.0007 |
| 1667.5679 | 1686.4475 | 1702.2695 |
| 3179.6753 | 3184.9140 | 3186.7551 |
| 3196.8912 | 3198.1218 | 3199.5934 |
| 3206.7568 | 3210.0586 | 3270.4144 |

No.15

|           |           |           |
|-----------|-----------|-----------|
| 71.6947   | 110.8679  | 120.9699  |
| 184.8732  | 246.0975  | 251.8966  |
| 276.7822  | 313.6591  | 430.3801  |
| 438.8763  | 480.0980  | 498.9384  |
| 534.7265  | 562.4148  | 583.3222  |
| 637.3555  | 675.3752  | 700.3552  |
| 741.8321  | 777.2713  | 802.0587  |
| 809.6038  | 830.6158  | 858.5399  |
| 892.6048  | 917.0845  | 946.0317  |
| 983.0595  | 998.6552  | 1014.9277 |
| 1043.1298 | 1060.6057 | 1089.5425 |
| 1133.5094 | 1166.2245 | 1174.9273 |
| 1179.5629 | 1197.6913 | 1203.5831 |
| 1226.5640 | 1245.5296 | 1309.9801 |
| 1323.8244 | 1348.9454 | 1374.7666 |
| 1451.6184 | 1472.5096 | 1491.8775 |
| 1521.3200 | 1526.7880 | 1639.9821 |
| 1662.8645 | 1680.2065 | 1691.2623 |
| 3073.1834 | 3109.2370 | 3177.9055 |
| 3182.8263 | 3190.3812 | 3200.3686 |
| 3204.8317 | 3215.7866 | 3222.6100 |

No.16

|          |          |          |
|----------|----------|----------|
| 56.0820  | 132.6609 | 140.8487 |
| 173.1578 | 223.9344 | 237.8060 |
| 310.9216 | 322.1446 | 421.3274 |

|           |           |           |
|-----------|-----------|-----------|
| 434.1348  | 479.9217  | 494.0170  |
| 506.8282  | 558.8364  | 578.2602  |
| 649.1727  | 670.8203  | 706.0376  |
| 743.8887  | 766.0940  | 780.7948  |
| 835.9875  | 845.5827  | 877.0861  |
| 880.5586  | 893.5161  | 949.7434  |
| 975.3622  | 984.7983  | 1008.3794 |
| 1026.1891 | 1056.6793 | 1099.7363 |
| 1127.3815 | 1154.6831 | 1167.9252 |
| 1171.6365 | 1194.1079 | 1212.2863 |
| 1232.2048 | 1262.0898 | 1305.1892 |
| 1322.9551 | 1335.3930 | 1368.9846 |
| 1449.3852 | 1462.8073 | 1494.2541 |
| 1513.4845 | 1529.9467 | 1645.9288 |
| 1657.3791 | 1682.4419 | 1688.6704 |
| 3068.1277 | 3105.8235 | 3175.0812 |
| 3188.7870 | 3190.0273 | 3191.6721 |
| 3199.8032 | 3210.1386 | 3217.9442 |

No.17

|           |           |           |
|-----------|-----------|-----------|
| 68.1966   | 107.7896  | 117.9632  |
| 179.4522  | 261.2524  | 264.8453  |
| 285.5092  | 303.6409  | 421.7576  |
| 436.3126  | 448.7222  | 493.3320  |
| 506.8783  | 588.3403  | 595.9374  |
| 639.0995  | 673.7062  | 702.8777  |
| 747.5909  | 783.9074  | 786.3544  |
| 823.6369  | 833.4633  | 864.8238  |
| 887.9983  | 903.2888  | 945.3965  |
| 977.6836  | 990.8064  | 1011.7163 |
| 1036.2408 | 1058.0988 | 1096.7462 |
| 1129.9090 | 1154.1640 | 1173.6787 |

|           |           |           |
|-----------|-----------|-----------|
| 1178.5747 | 1198.0377 | 1217.9918 |
| 1231.9649 | 1266.8881 | 1292.2437 |
| 1323.2363 | 1348.6049 | 1367.6643 |
| 1452.1316 | 1460.4983 | 1494.1473 |
| 1521.1490 | 1529.0675 | 1647.6747 |
| 1661.6855 | 1680.8212 | 1691.6428 |
| 3068.6576 | 3105.2995 | 3180.7178 |
| 3186.3708 | 3187.0859 | 3197.7491 |
| 3207.4326 | 3209.9012 | 3223.0544 |

No.18

|           |           |           |
|-----------|-----------|-----------|
| 71.0618   | 102.5918  | 138.7623  |
| 191.9482  | 241.0300  | 260.5081  |
| 285.7072  | 321.4030  | 421.9577  |
| 439.4527  | 477.0840  | 510.9244  |
| 526.2287  | 553.6404  | 575.3139  |
| 642.7172  | 661.0645  | 708.4609  |
| 749.4027  | 776.5317  | 784.1556  |
| 789.1725  | 842.9101  | 882.7737  |
| 899.5670  | 919.9462  | 957.0756  |
| 981.1496  | 995.4202  | 1014.4543 |
| 1024.2587 | 1068.1346 | 1102.0130 |
| 1132.4656 | 1158.5358 | 1166.6266 |
| 1182.0323 | 1195.8913 | 1200.1848 |
| 1232.3033 | 1259.8754 | 1286.6672 |
| 1324.1726 | 1349.0040 | 1372.6538 |
| 1452.9528 | 1469.9627 | 1490.3251 |
| 1516.8136 | 1525.4379 | 1637.5655 |
| 1657.6509 | 1681.3323 | 1685.6210 |
| 3061.2921 | 3100.0726 | 3175.3943 |
| 3182.9707 | 3194.4922 | 3202.6253 |
| 3209.4740 | 3221.5731 | 3228.6296 |

No.19

|           |           |           |
|-----------|-----------|-----------|
| 63.3826   | 100.7129  | 102.4651  |
| 152.3402  | 198.4432  | 273.7389  |
| 292.6639  | 419.7539  | 425.4952  |
| 444.4281  | 458.2490  | 514.1568  |
| 569.3506  | 583.8913  | 633.0109  |
| 654.8318  | 676.9886  | 756.5153  |
| 758.5861  | 764.6947  | 798.6304  |
| 802.3696  | 856.2105  | 877.1066  |
| 900.7015  | 901.6288  | 978.2042  |
| 978.5760  | 1012.5954 | 1014.4028 |
| 1028.2149 | 1055.5501 | 1057.6296 |
| 1121.8940 | 1137.6949 | 1171.9817 |
| 1178.2288 | 1183.9799 | 1191.7043 |
| 1216.6137 | 1227.2079 | 1258.6084 |
| 1322.0911 | 1322.9933 | 1335.2166 |
| 1382.2608 | 1490.9658 | 1493.7702 |
| 1523.1247 | 1531.5679 | 1654.5842 |
| 1661.6441 | 1684.6531 | 1684.8755 |
| 3135.3089 | 3200.5598 | 3201.3288 |
| 3206.6382 | 3207.5991 | 3215.8608 |
| 3216.5817 | 3227.3048 | 3227.5940 |

No.20

|          |          |          |
|----------|----------|----------|
| 99.8908  | 143.8880 | 161.3883 |
| 217.3368 | 281.7067 | 286.9246 |
| 402.5952 | 440.8197 | 457.9989 |
| 524.8097 | 534.1163 | 570.0574 |
| 584.3606 | 628.5718 | 665.1490 |
| 689.0027 | 748.1339 | 768.7667 |
| 779.6640 | 818.4804 | 829.2614 |

|           |           |           |
|-----------|-----------|-----------|
| 854.7549  | 924.8930  | 943.6455  |
| 955.1568  | 1006.0535 | 1014.1895 |
| 1035.8633 | 1058.5450 | 1063.9499 |
| 1110.7121 | 1170.7201 | 1205.7566 |
| 1217.3518 | 1249.6446 | 1281.7254 |
| 1294.7686 | 1397.9529 | 1419.5089 |
| 1454.4121 | 1485.9030 | 1510.4511 |
| 1534.7042 | 1580.1130 | 1676.8119 |
| 1695.8262 | 1704.8147 | 3174.8773 |
| 3187.5315 | 3192.9620 | 3198.6934 |
| 3208.3149 | 3218.0358 | 3231.9017 |

No.21

|           |           |           |
|-----------|-----------|-----------|
| 79.5221   | 160.3016  | 186.9420  |
| 225.2259  | 265.3143  | 273.5381  |
| 390.5227  | 452.6231  | 499.6083  |
| 504.6471  | 535.2999  | 582.1290  |
| 596.1460  | 612.0596  | 680.4449  |
| 687.4484  | 704.7764  | 737.8238  |
| 779.6443  | 810.6114  | 842.0192  |
| 861.6538  | 896.8704  | 940.0585  |
| 968.8587  | 984.0126  | 1006.4941 |
| 1034.5436 | 1050.1706 | 1103.5787 |
| 1113.0037 | 1144.7944 | 1176.0603 |
| 1211.8400 | 1247.7195 | 1260.8372 |
| 1334.4008 | 1369.8813 | 1422.7368 |
| 1450.7832 | 1479.5529 | 1508.3498 |
| 1527.5831 | 1574.2887 | 1670.4846 |
| 1685.5593 | 1697.2552 | 3176.9350 |
| 3189.2241 | 3192.6756 | 3207.3123 |
| 3207.8514 | 3232.9604 | 3257.0000 |

No.22

|           |           |           |
|-----------|-----------|-----------|
| 89.1839   | 178.9486  | 188.7436  |
| 226.8266  | 259.3274  | 264.6012  |
| 377.0299  | 441.9122  | 472.4978  |
| 492.0914  | 547.1957  | 592.5283  |
| 596.0514  | 610.2076  | 670.5054  |
| 699.9935  | 734.9095  | 738.6221  |
| 785.0510  | 819.3364  | 840.4315  |
| 884.6535  | 888.4995  | 935.4680  |
| 949.9675  | 967.8458  | 1004.4926 |
| 1041.1889 | 1052.4756 | 1080.5826 |
| 1109.2799 | 1117.1060 | 1185.0443 |
| 1226.6784 | 1231.8819 | 1272.7550 |
| 1333.4040 | 1386.3142 | 1409.1312 |
| 1430.3582 | 1481.1513 | 1503.2539 |
| 1523.2436 | 1580.4721 | 1673.8519 |
| 1692.7450 | 1699.7177 | 3185.5011 |
| 3196.5143 | 3196.6735 | 3206.6989 |
| 3225.7066 | 3228.0807 | 3248.4992 |

No.23

|           |           |           |
|-----------|-----------|-----------|
| 93.1948   | 160.3301  | 170.5347  |
| 217.0122  | 280.8610  | 285.4617  |
| 406.1051  | 455.3368  | 462.2577  |
| 490.8030  | 536.9749  | 579.8263  |
| 587.7579  | 627.5744  | 673.7830  |
| 685.8038  | 732.3985  | 736.7361  |
| 790.5881  | 818.1580  | 825.3479  |
| 864.1487  | 896.3516  | 952.5654  |
| 964.5609  | 975.1192  | 1009.6921 |
| 1038.2756 | 1047.6785 | 1096.9158 |
| 1104.7355 | 1130.0934 | 1191.1864 |
| 1228.2548 | 1240.1737 | 1271.2777 |



|           |           |           |
|-----------|-----------|-----------|
| 1325.5414 | 1392.9841 | 1398.6950 |
| 1432.8976 | 1475.0993 | 1503.7353 |
| 1526.5366 | 1579.6806 | 1678.6714 |
| 1680.2301 | 1697.9868 | 3188.5569 |
| 3196.2653 | 3202.4014 | 3215.1471 |
| 3215.5326 | 3227.9951 | 3248.0435 |

No.24

|           |           |           |
|-----------|-----------|-----------|
| 32.2224   | 111.5418  | 158.3536  |
| 216.0148  | 249.0009  | 270.2512  |
| 420.9626  | 451.0561  | 468.4589  |
| 494.0000  | 512.8750  | 528.9417  |
| 554.9963  | 623.8964  | 662.8552  |
| 664.7159  | 684.8113  | 771.5351  |
| 794.4497  | 814.6461  | 834.4741  |
| 853.6462  | 909.9171  | 938.8324  |
| 958.4224  | 996.8617  | 1002.2695 |
| 1008.7786 | 1031.7275 | 1040.3943 |
| 1071.3742 | 1114.6121 | 1172.6286 |
| 1179.5795 | 1200.7453 | 1222.6009 |
| 1241.4264 | 1243.1098 | 1249.2981 |
| 1288.6609 | 1308.7213 | 1393.2969 |
| 1406.4037 | 1456.8303 | 1469.5947 |
| 1486.2103 | 1517.5603 | 1553.1372 |
| 1672.6489 | 1681.6262 | 1701.5704 |
| 3076.3340 | 3143.0325 | 3165.5708 |
| 3197.3953 | 3197.6849 | 3207.9001 |
| 3208.5850 | 3220.0103 | 3221.2126 |

No.25

|          |          |          |
|----------|----------|----------|
| 80.0306  | 95.0630  | 154.7358 |
| 198.6774 | 218.8386 | 273.5758 |

|           |           |           |
|-----------|-----------|-----------|
| 289.1565  | 446.9264  | 447.8648  |
| 496.8208  | 505.1290  | 525.3185  |
| 562.5466  | 584.2786  | 636.9287  |
| 658.0114  | 683.4136  | 751.7587  |
| 780.3212  | 821.5167  | 836.9961  |
| 847.6215  | 877.2987  | 916.6052  |
| 968.4010  | 982.9236  | 1004.9196 |
| 1022.4563 | 1031.7455 | 1053.5926 |
| 1108.4520 | 1146.6882 | 1173.7640 |
| 1176.2272 | 1209.4320 | 1244.4302 |
| 1244.7305 | 1246.1512 | 1281.9182 |
| 1311.4061 | 1376.0375 | 1403.5037 |
| 1453.3961 | 1467.7851 | 1476.3712 |
| 1495.9867 | 1514.4769 | 1546.9040 |
| 1666.3835 | 1682.4419 | 1694.4605 |
| 3064.8397 | 3087.8313 | 3102.1057 |
| 3127.8282 | 3172.7356 | 3189.3922 |
| 3191.0744 | 3205.2349 | 3206.9199 |

No.26

|           |           |           |
|-----------|-----------|-----------|
| 59.3108   | 96.8199   | 177.1792  |
| 191.8302  | 225.1314  | 261.8246  |
| 269.9586  | 441.3550  | 451.8982  |
| 462.3129  | 520.5922  | 539.5064  |
| 558.4202  | 582.0156  | 633.4968  |
| 674.8127  | 706.1853  | 749.6076  |
| 790.3496  | 832.3929  | 838.3041  |
| 862.9383  | 884.1219  | 902.1781  |
| 929.9886  | 970.1928  | 1006.9217 |
| 1025.9011 | 1041.8758 | 1051.7722 |
| 1088.9919 | 1116.6682 | 1178.2098 |
| 1185.4713 | 1225.6373 | 1239.0497 |

|           |           |           |
|-----------|-----------|-----------|
| 1244.5674 | 1247.2684 | 1284.5171 |
| 1309.8451 | 1388.9104 | 1400.5471 |
| 1422.5366 | 1469.1172 | 1483.2682 |
| 1499.8577 | 1506.4294 | 1547.5426 |
| 1666.4923 | 1678.2928 | 1695.0564 |
| 3061.4147 | 3088.1383 | 3097.8809 |
| 3128.5808 | 3183.3618 | 3193.1229 |
| 3202.5459 | 3208.9323 | 3226.0390 |

No.27

|           |           |           |
|-----------|-----------|-----------|
| 64.8880   | 97.3906   | 164.8981  |
| 174.3429  | 222.2106  | 278.4228  |
| 305.7950  | 455.1071  | 455.5036  |
| 468.1524  | 485.4507  | 527.4840  |
| 579.2455  | 590.7075  | 624.8146  |
| 661.6143  | 708.0750  | 747.2217  |
| 796.3927  | 818.3400  | 829.6864  |
| 857.4082  | 865.3564  | 925.0957  |
| 959.5441  | 972.5397  | 1006.3040 |
| 1027.0881 | 1037.0645 | 1055.0372 |
| 1100.6510 | 1132.4457 | 1177.8323 |
| 1193.2952 | 1235.2793 | 1242.4068 |
| 1243.5975 | 1246.0496 | 1277.4175 |
| 1301.6817 | 1374.4585 | 1398.8396 |
| 1432.2892 | 1470.5901 | 1473.3562 |
| 1498.5737 | 1511.5543 | 1550.7103 |
| 1660.7718 | 1679.2930 | 1694.1771 |
| 3065.2335 | 3078.1354 | 3099.7161 |
| 3120.2745 | 3187.3344 | 3193.3572 |
| 3199.0244 | 3208.5633 | 3209.2039 |
